# Supplementary material for: Pretrichodermamides D–F from a Marine Algicolous Fungus Penicillium sp. KMM 4672
Source: PubMed Central journal article supplement (PMC4962012; doi:10.3390/md14070122), 2016-06-27
Supplement: marinedrugs-14-00122-s001.pdf [file marinedrugs-14-00122-s001.pdf]

# Supplementary Materials: Pretrichodermamides D–F from a Marine Algicolous Fungus *Penicillium* sp. KMM 4672

Anton N. Yurchenko <sup>1,\*</sup>, Olga F. Smetanina <sup>1</sup>, Elena V. Ivanets <sup>2</sup>, Anatoly I. Kalinovsky <sup>1</sup>, Yuliya V. Khudyakova <sup>1</sup>, Natalya N. Kirichuk <sup>1</sup>, Roman S. Popov <sup>1</sup>, Carsten Bokemeyer <sup>3</sup>, Gunhild von Amsberg <sup>3</sup>, Ekaterina A. Chingizova <sup>1</sup>, Shamil Sh. Afiyatullof <sup>1</sup> and Sergey A. Dyshlovoy <sup>1,2,3</sup>

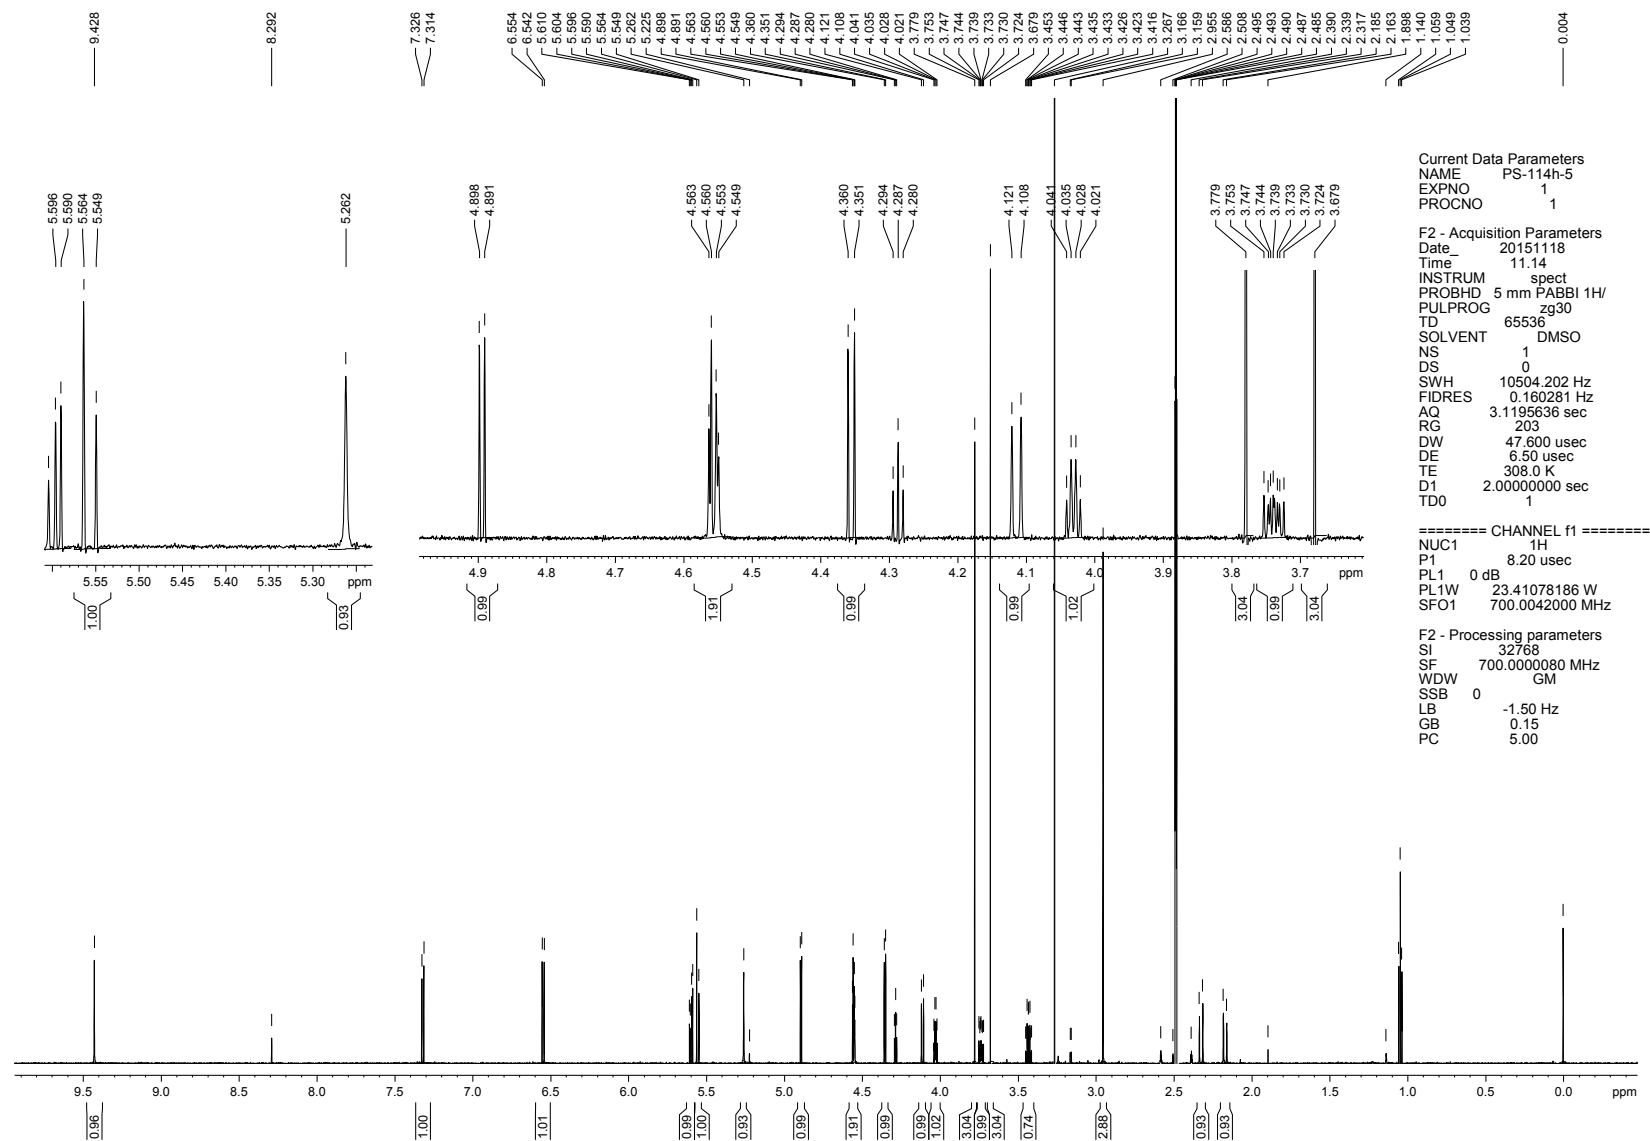

Figure S1.  $^1\text{H}$  NMR (700 MHz,  $\text{DMSO-d}_6$ ) spectrum of pretrichoderamide D (1).

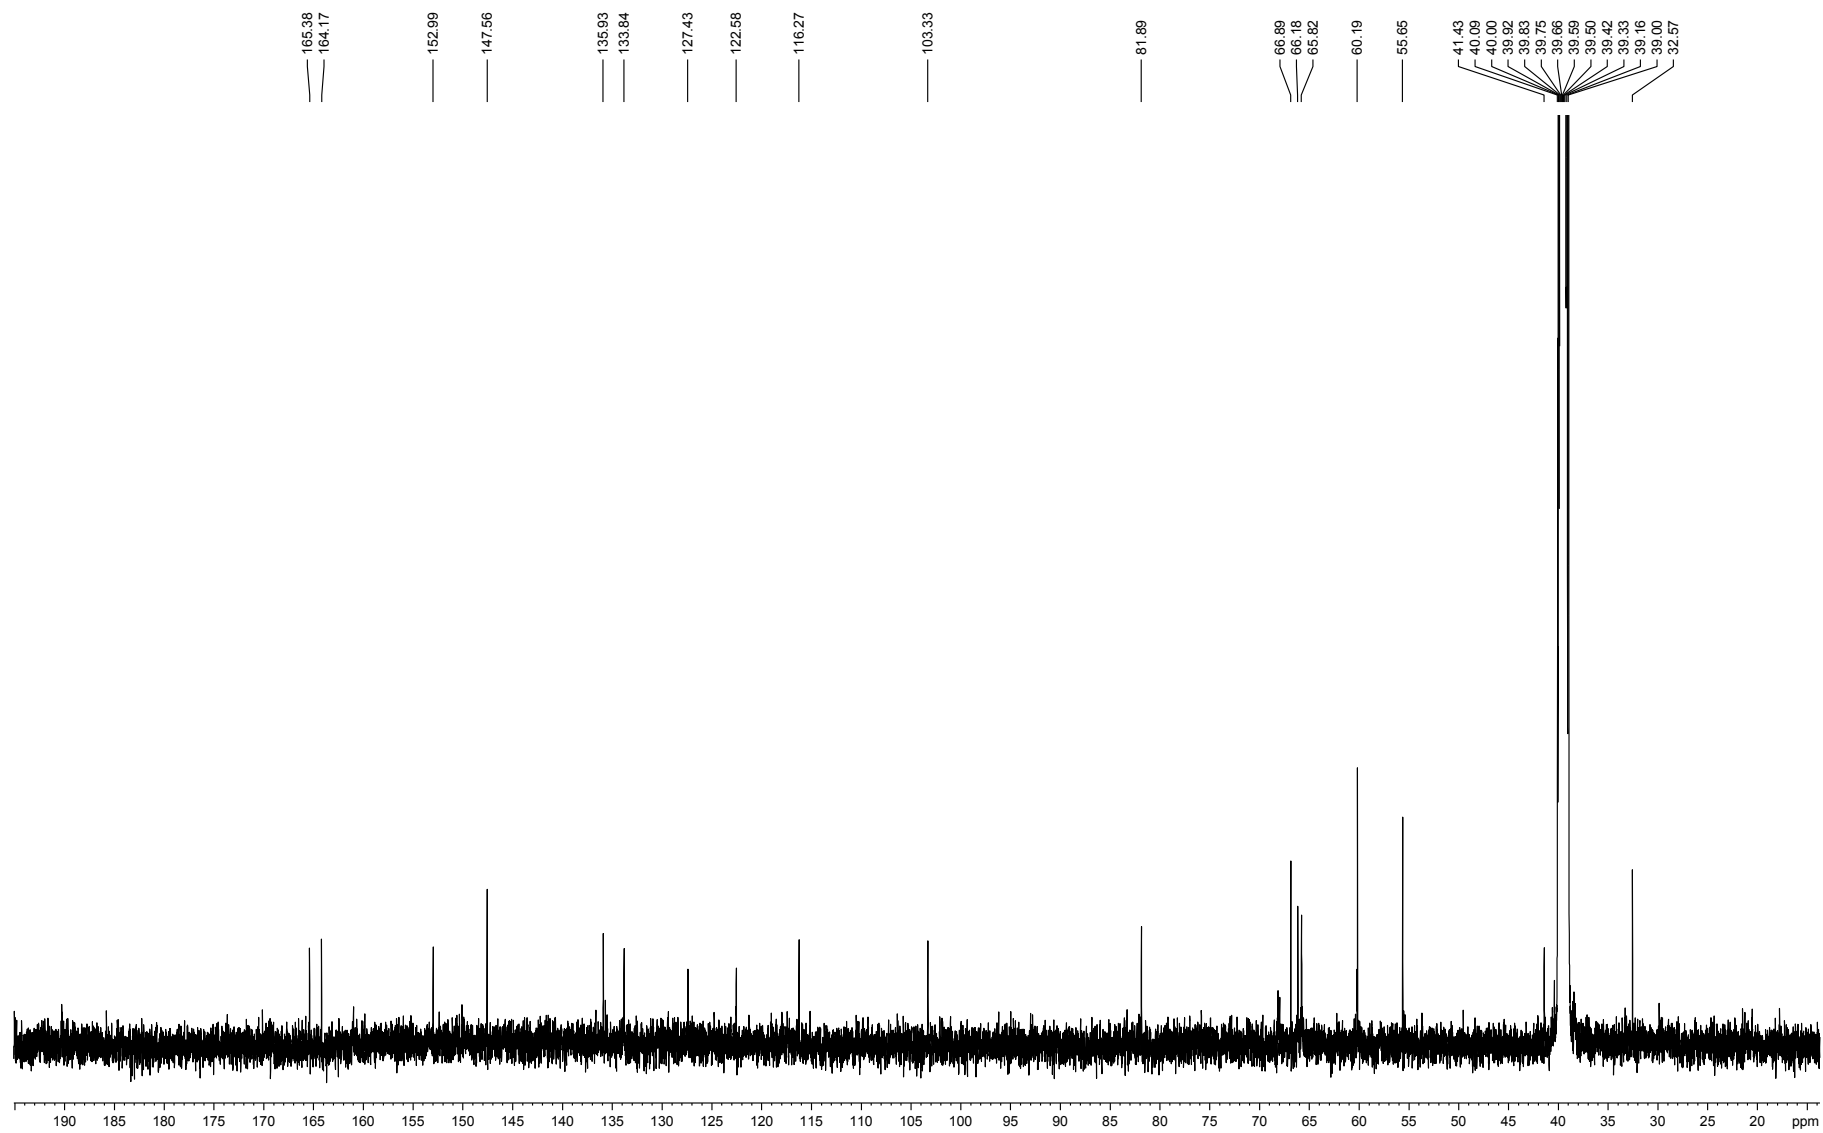

Figure S2. <sup>13</sup>C NMR (125 MHz, DMSO-d<sub>6</sub>) spectrum of pretrichoderamide D (1).

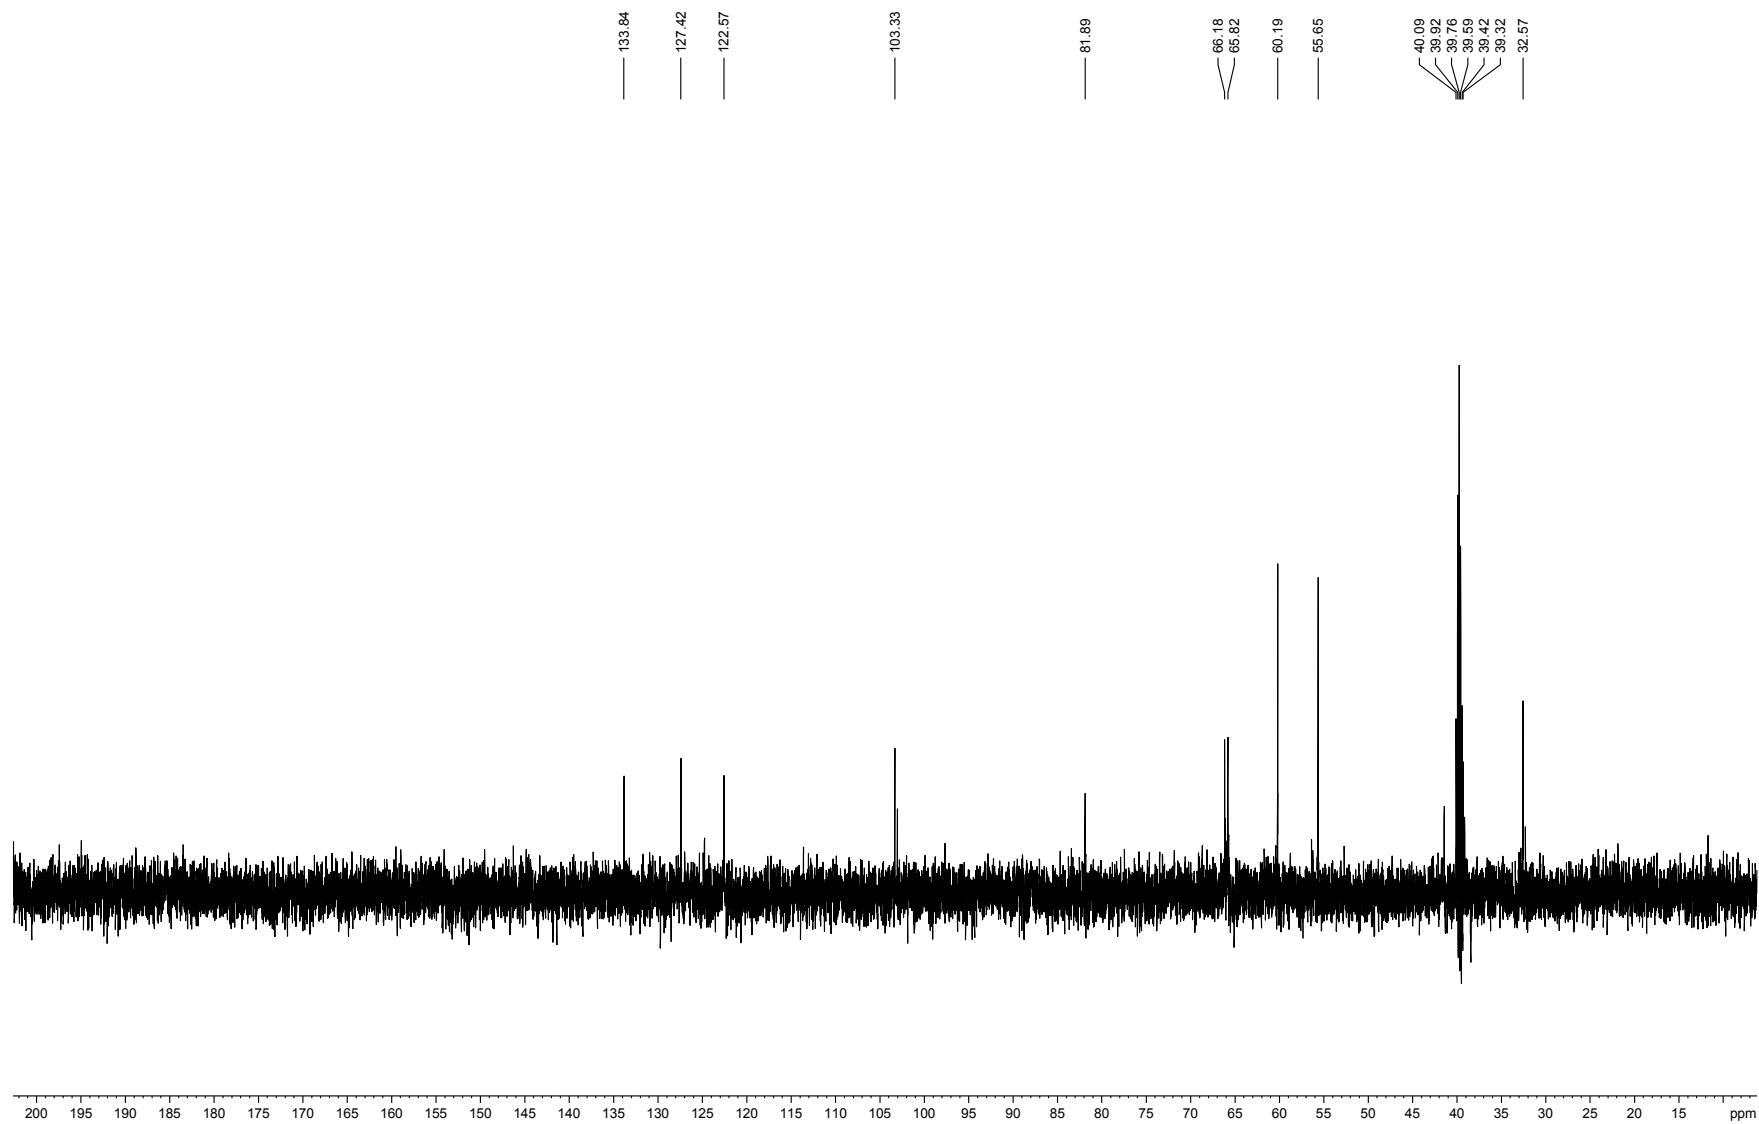

Figure S3. DEPT-135 (125 MHz, DMSO-d<sub>6</sub>) spectrum of pretrichodermamide D (1).

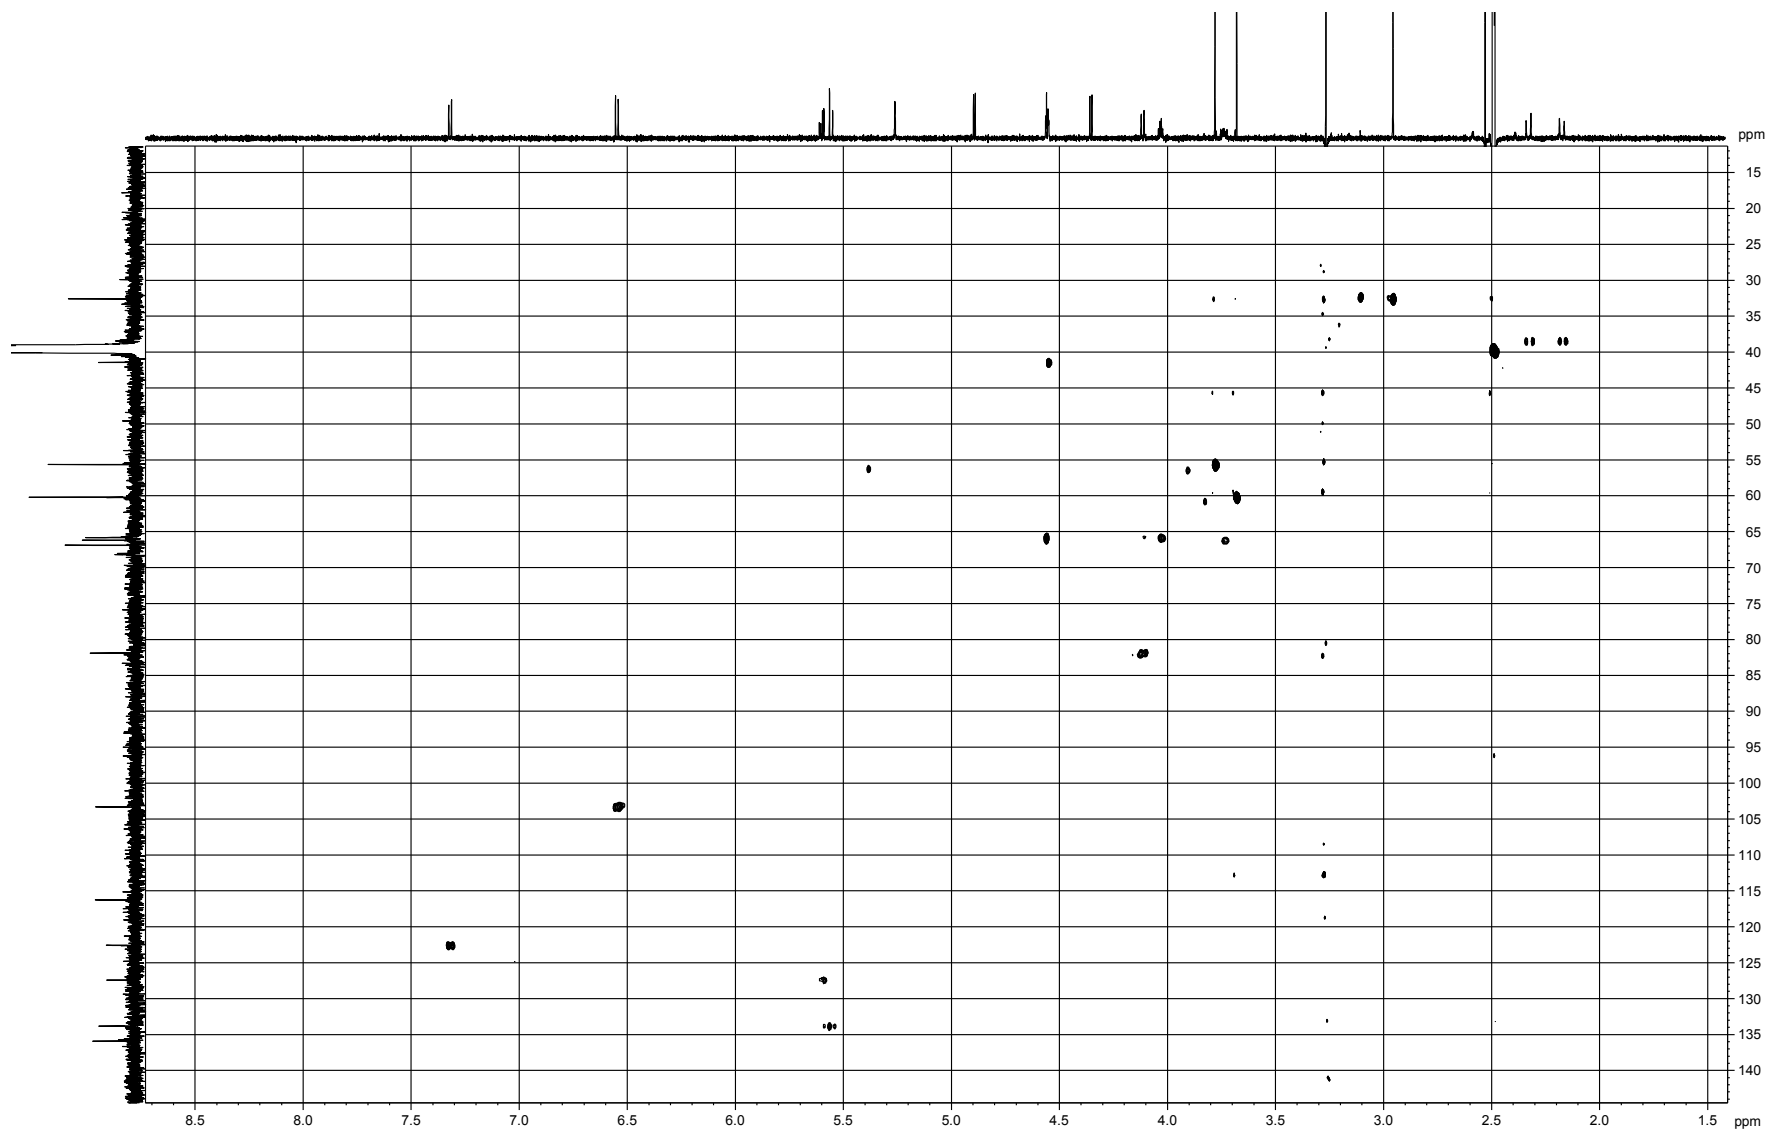

Figure S4. HSQC (500/125 MHz, DMSO-d<sub>6</sub>) spectrum of pretrichoderamide D (1).

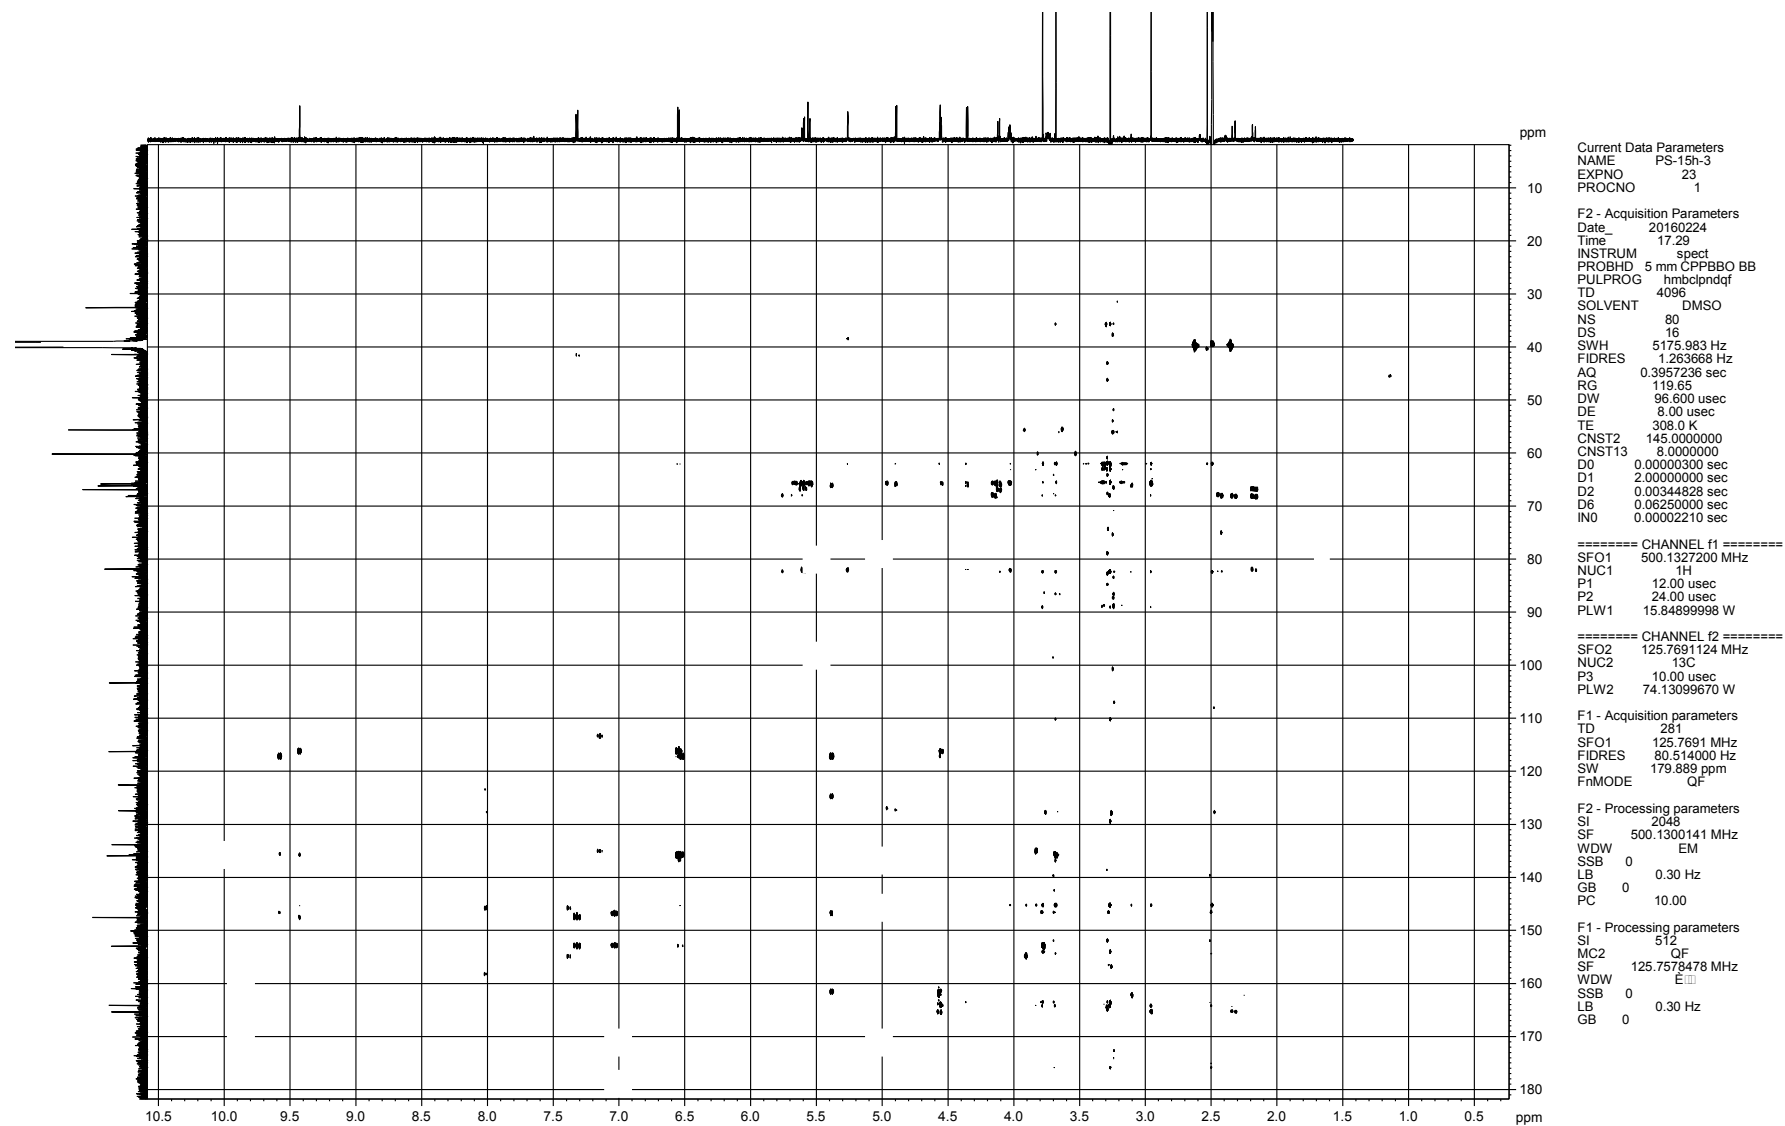Figure S5. HMBC (500 MHz, DMSO-d<sub>6</sub>) spectrum of pretrichodermamide D (1).

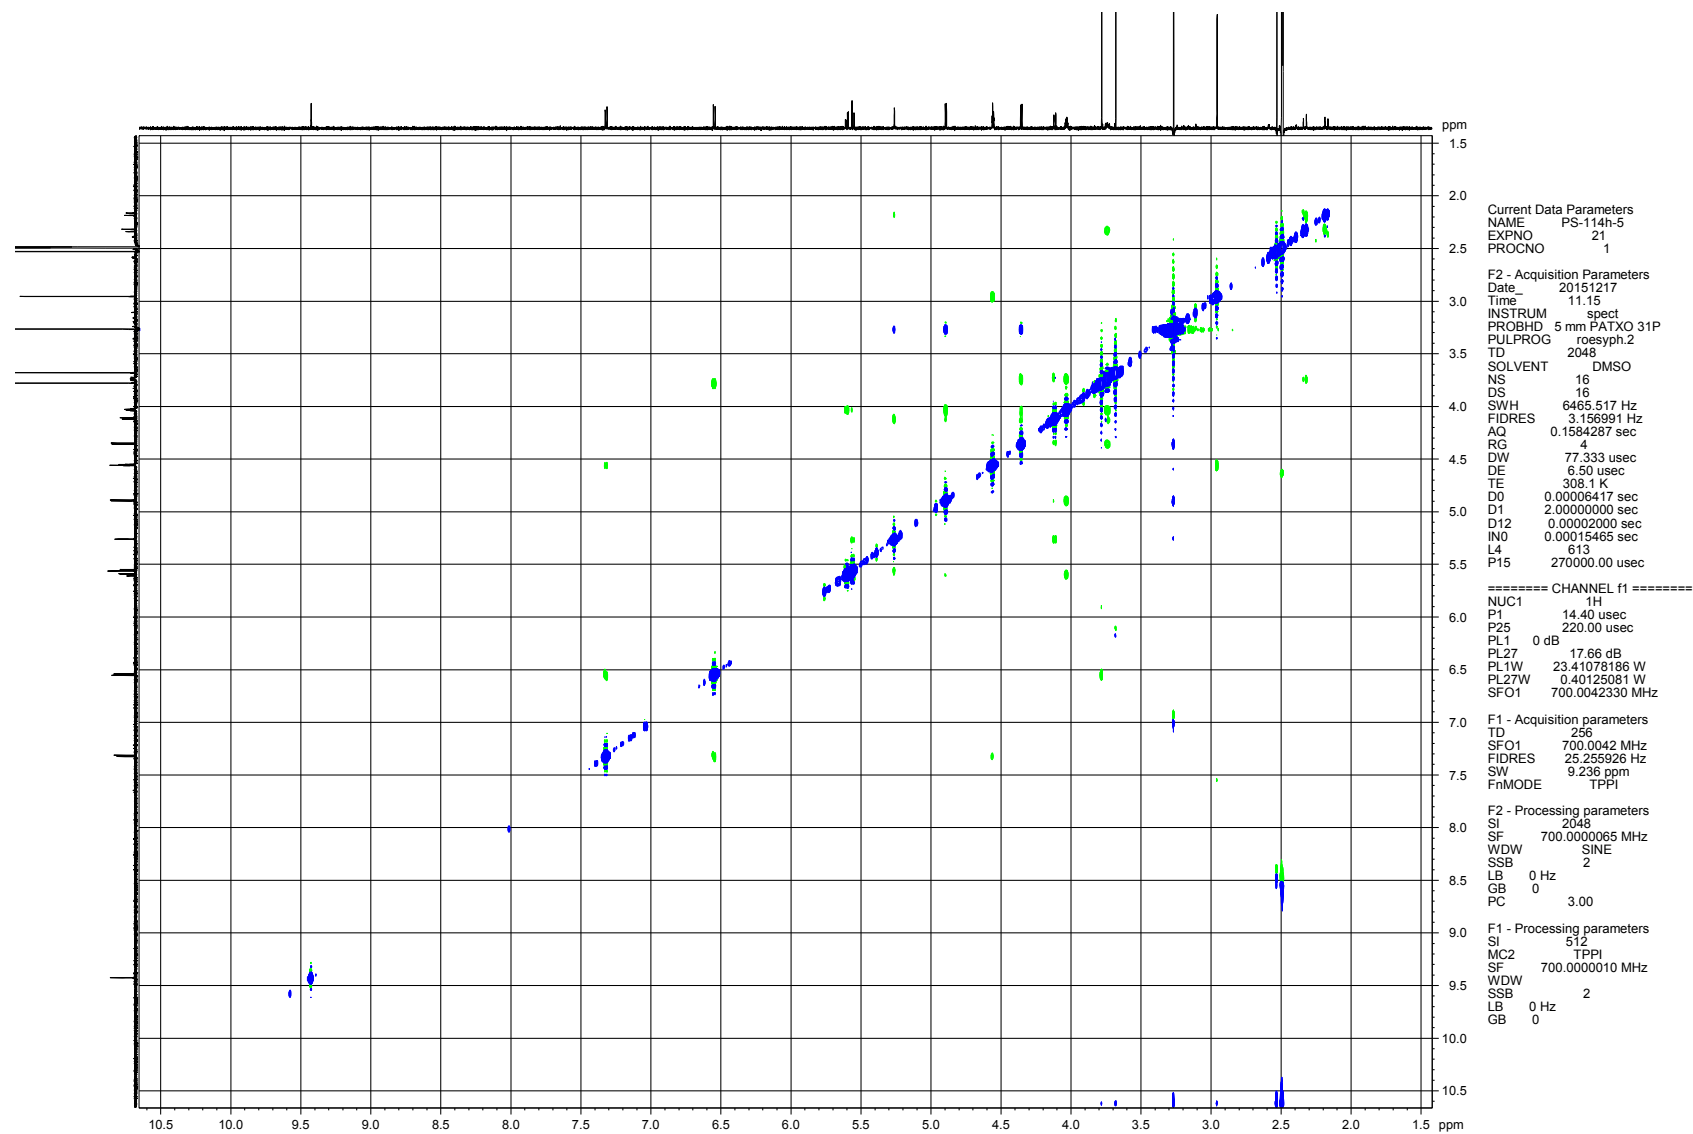

Figure S6. ROESY (700 MHz, DMSO-d<sub>6</sub>) spectrum of pretrichodermamide D (1).

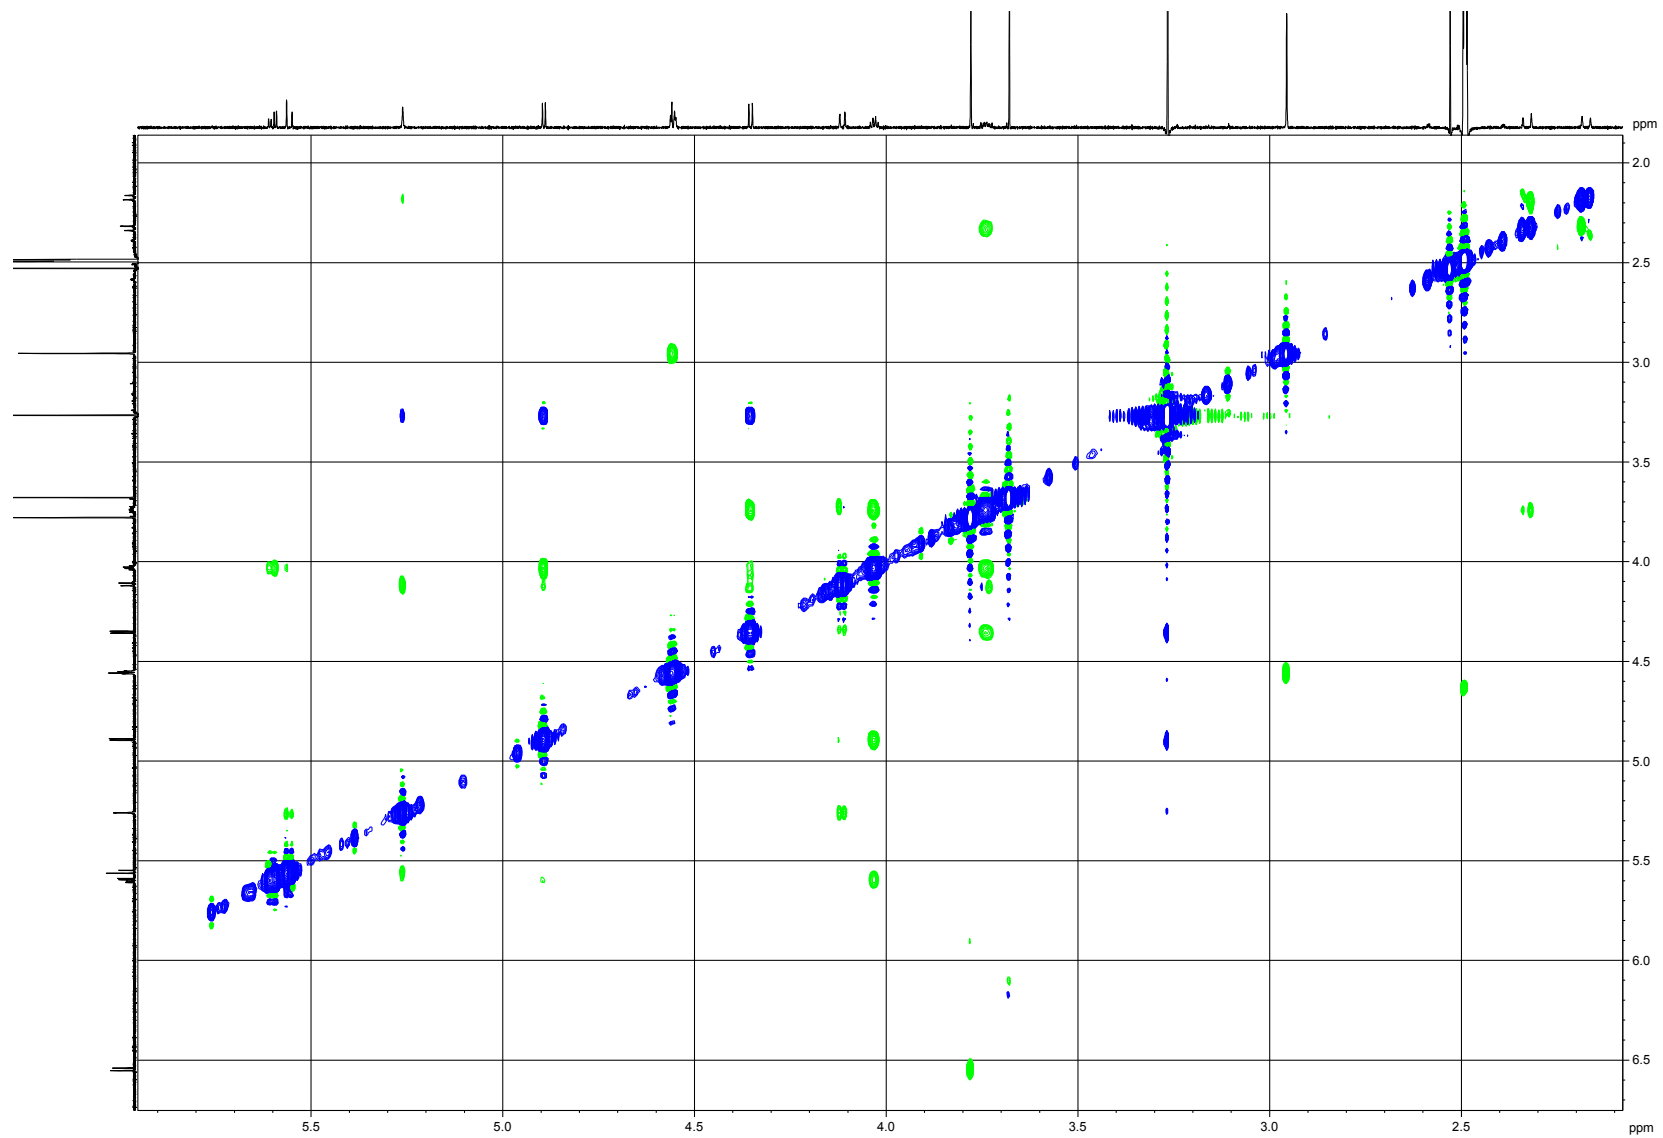

Figure S6 (continuation). ROESY (700 MHz, DMSO-d<sub>6</sub>) spectrum of pretrichodermamide D (1).





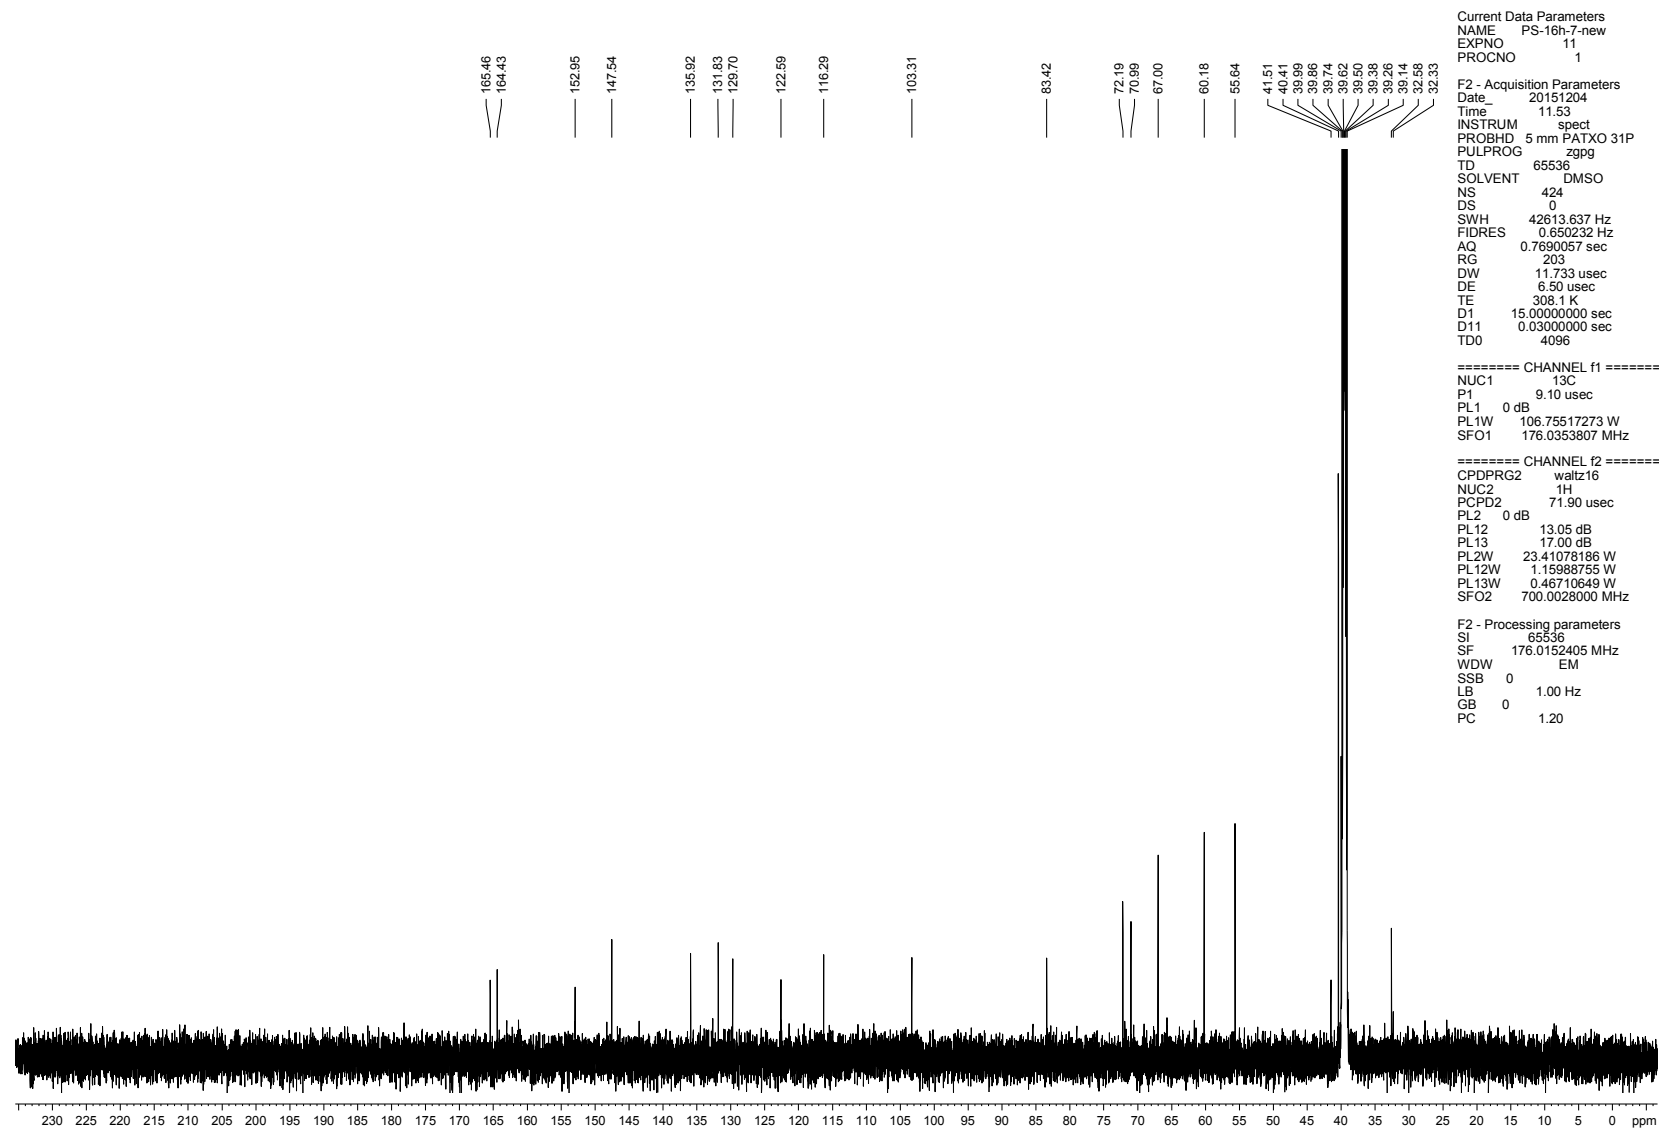

Figure S8.  $^{13}\text{C}$  NMR (176 MHz,  $\text{DMSO-d}_6$ ) spectrum of pretrichodermamide E (2).

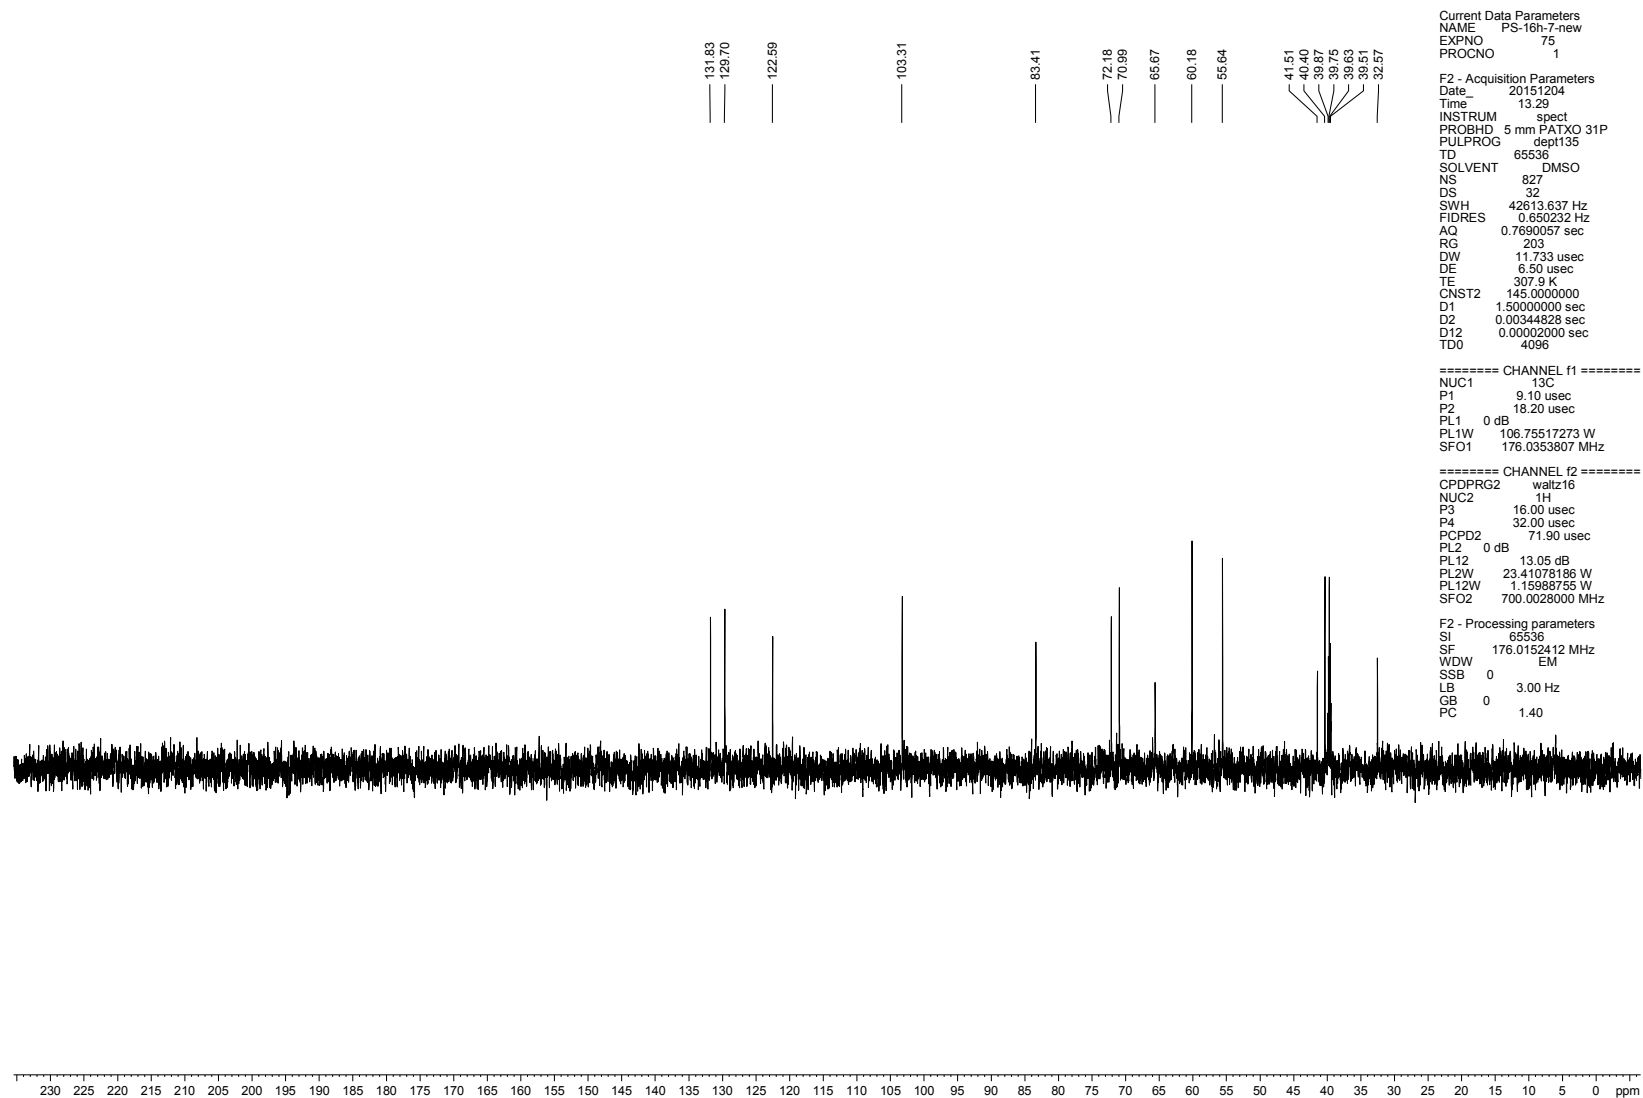

Figure S9. DEPT-135 (176 MHz, DMSO-d<sub>6</sub>) spectrum of pretrichodermamide E (2).

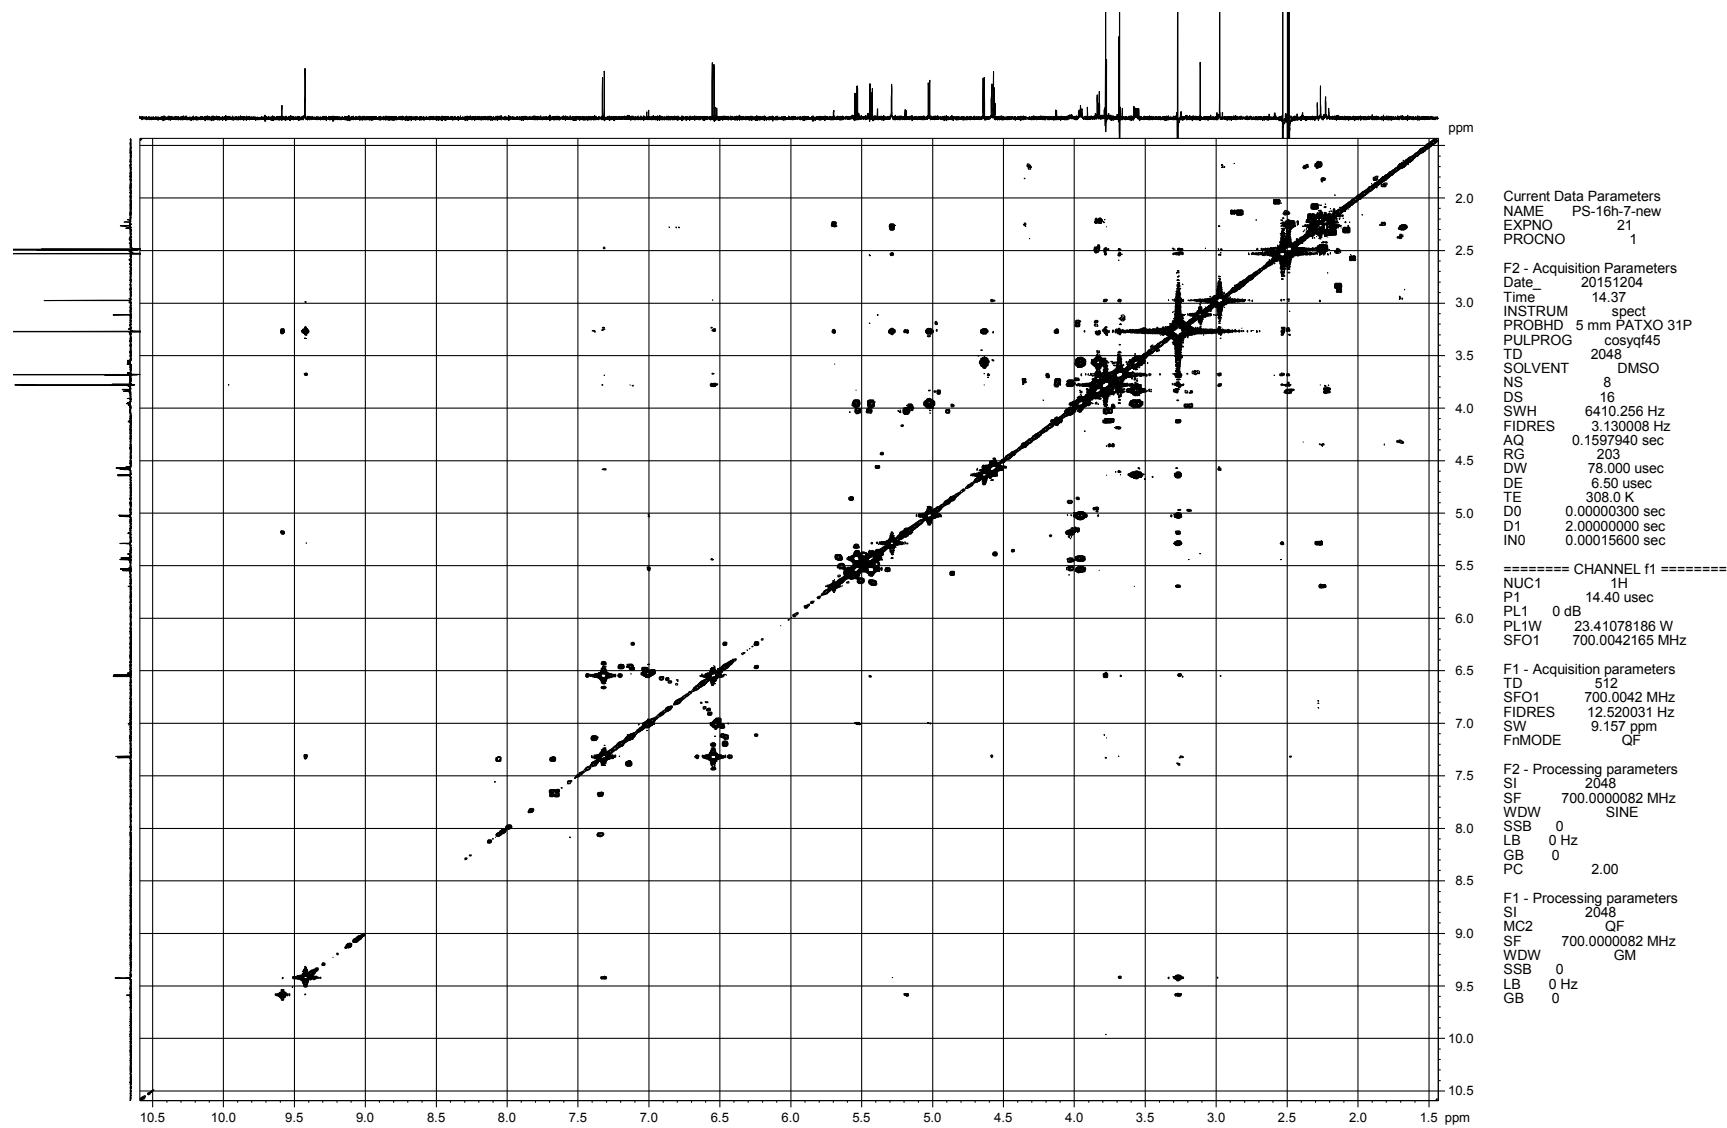Figure S10.  $^1\text{H}$ - $^1\text{H}$  COSY (700 MHz, DMSO- $d_6$ ) spectrum of pretrichodermamide E (2).

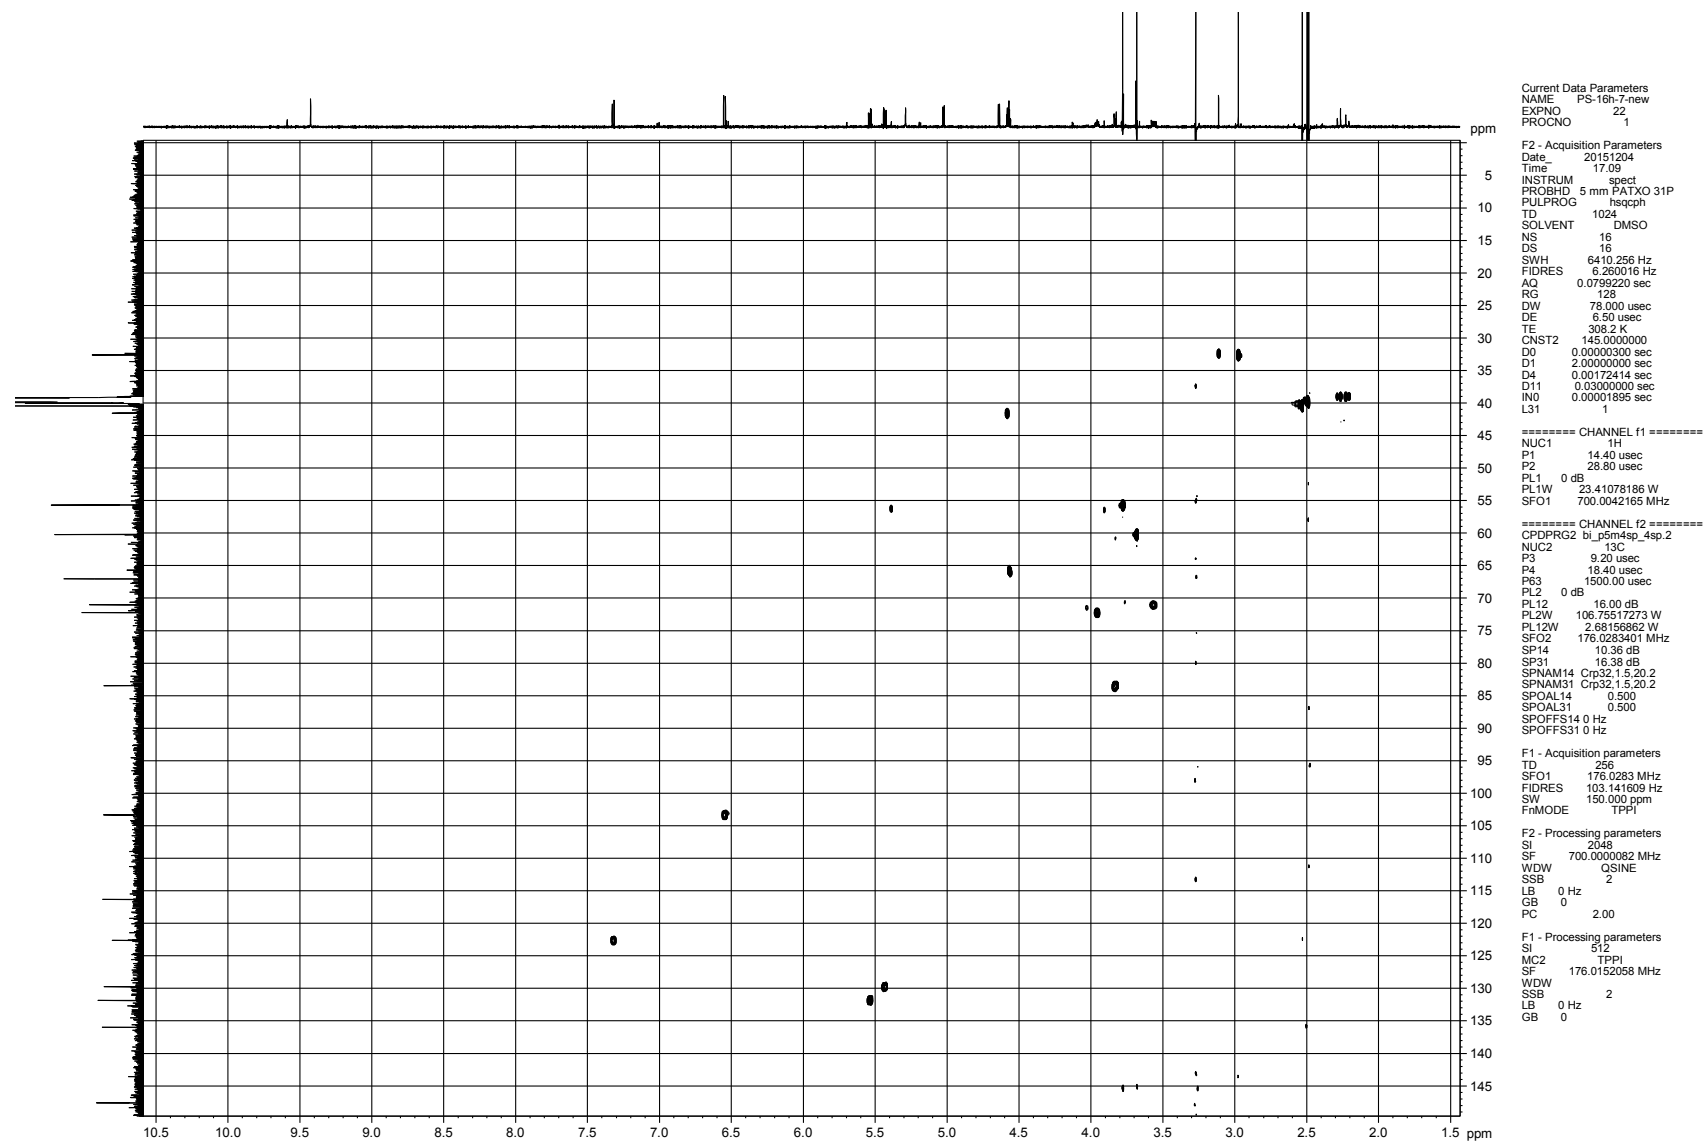Figure S11. HSQC (700 MHz, DMSO-d<sub>6</sub>) spectrum of pretrichodermamide E (2).

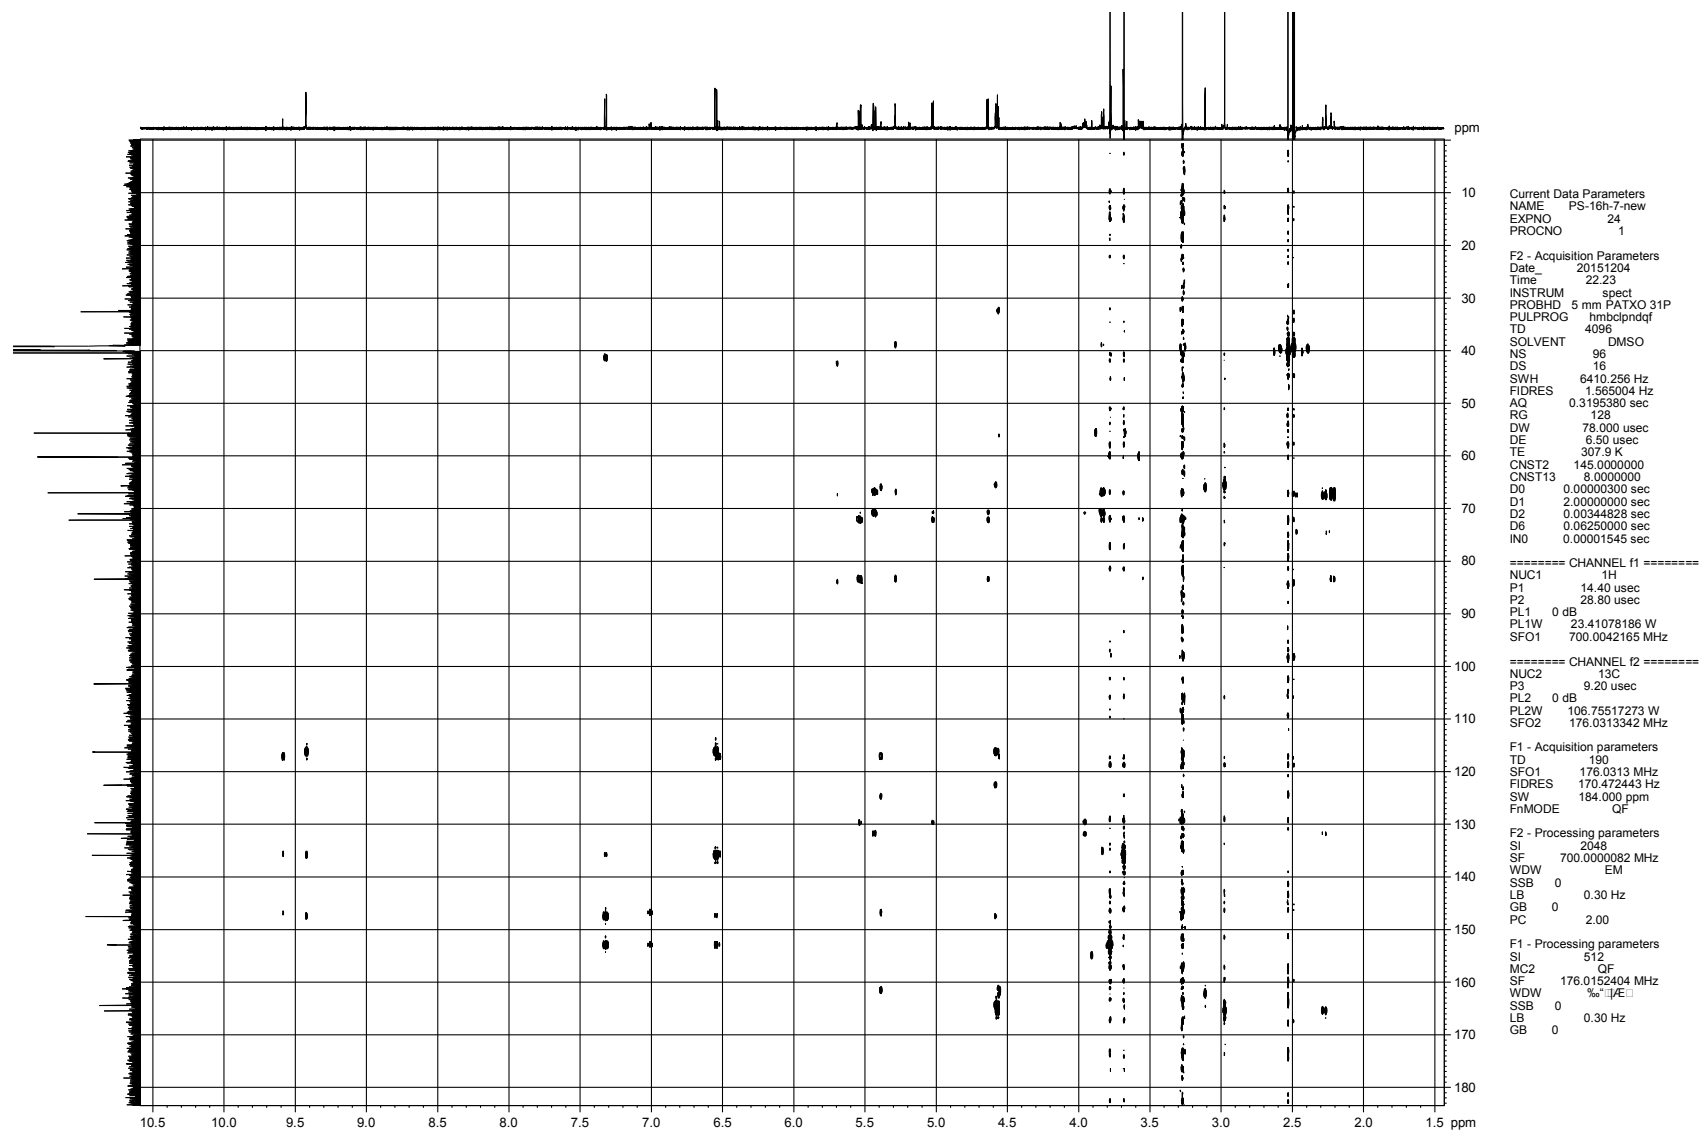Figure S12. HMBC (700 MHz, DMSO-d<sub>6</sub>) spectrum of pretrichodermamide E (2).

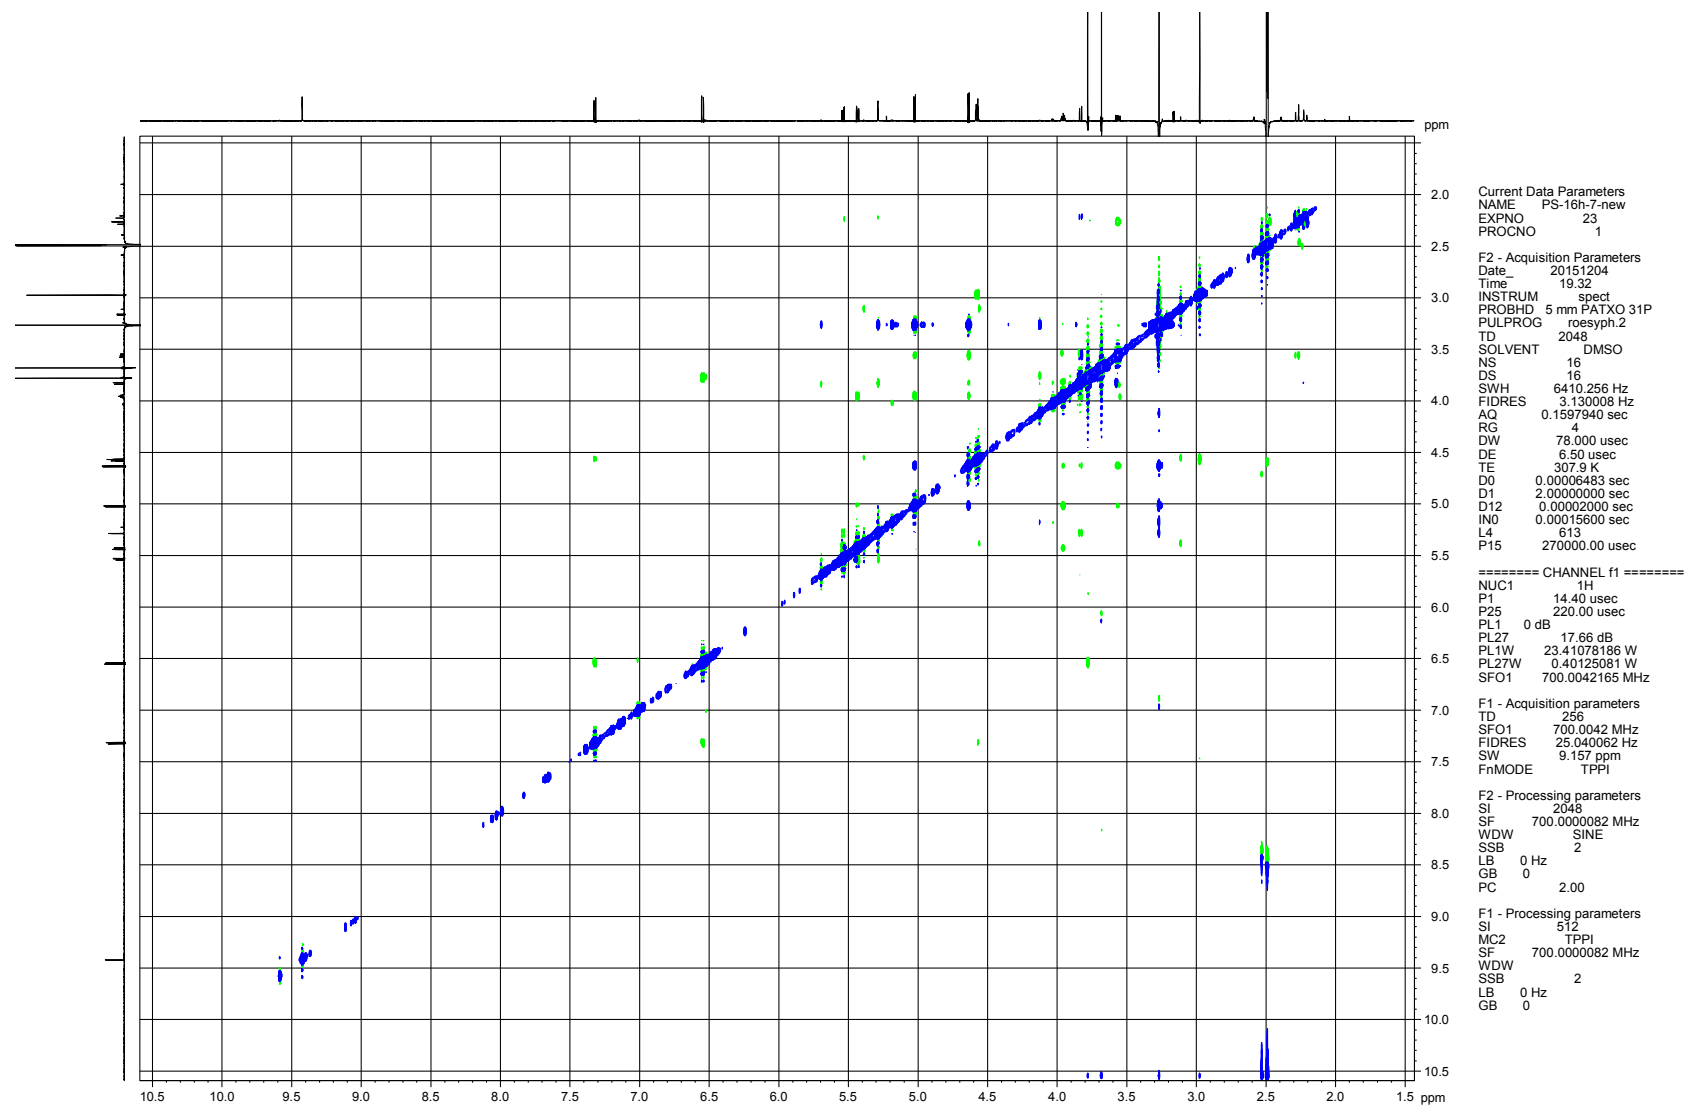

Figure S13. ROESY (700 MHz, DMSO-d<sub>6</sub>) spectrum of pretrichodermamide E (2).

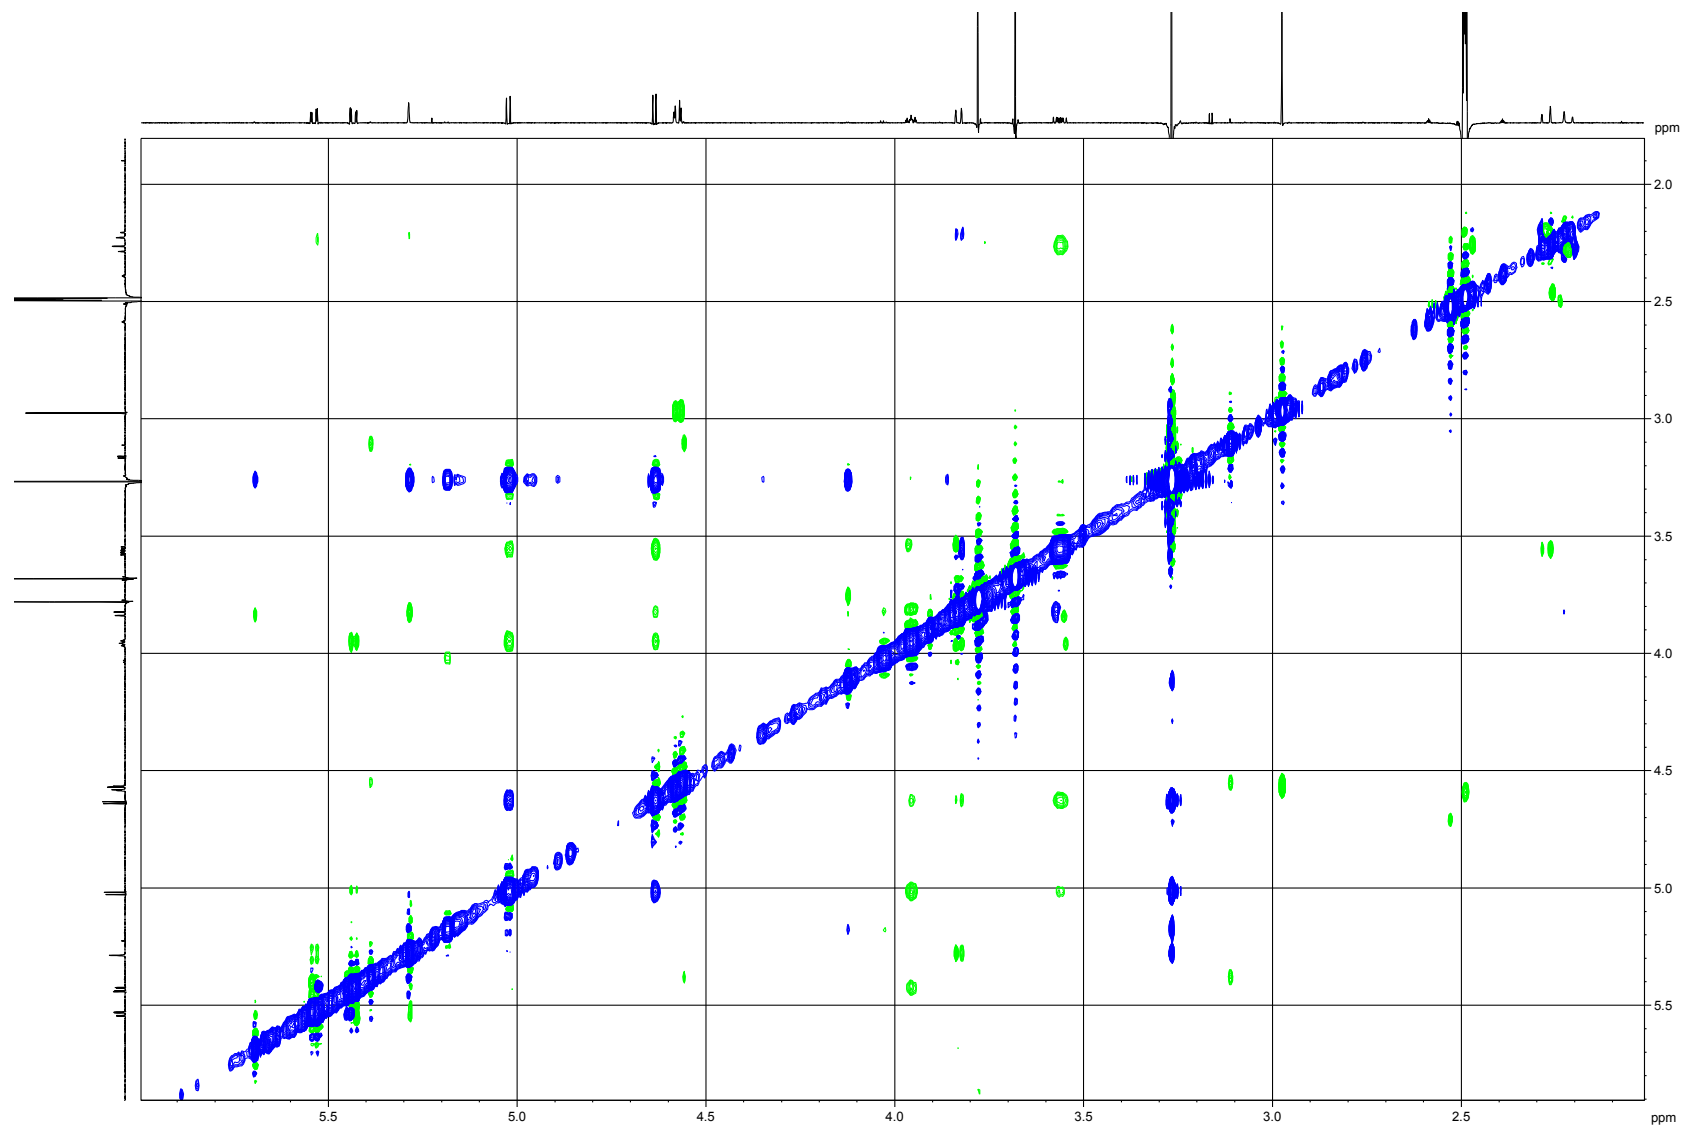

Figure S13 (continuation). ROESY (700 MHz, DMSO-d<sub>6</sub>) spectrum of pretrichodermamide E (2).



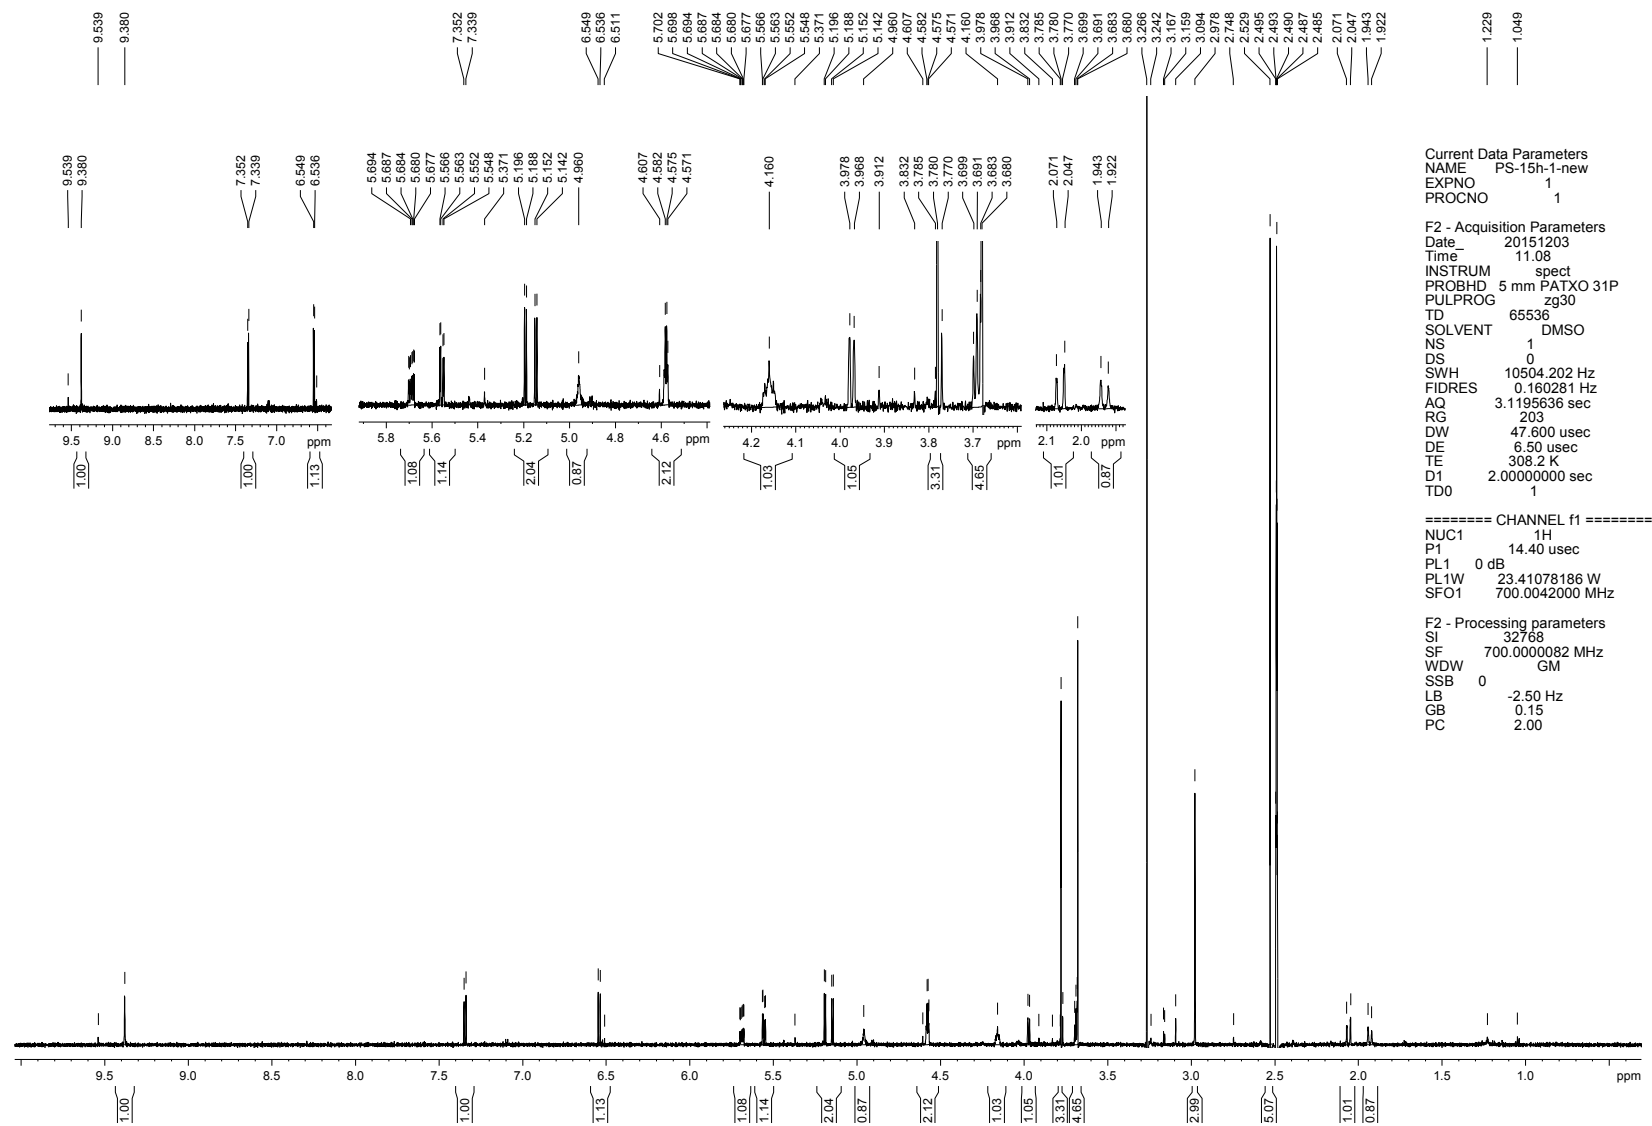

Figure S14.  $^1\text{H}$  NMR (700 MHz,  $\text{DMSO-d}_6$ ) spectrum of pretrichodermamide F (3).

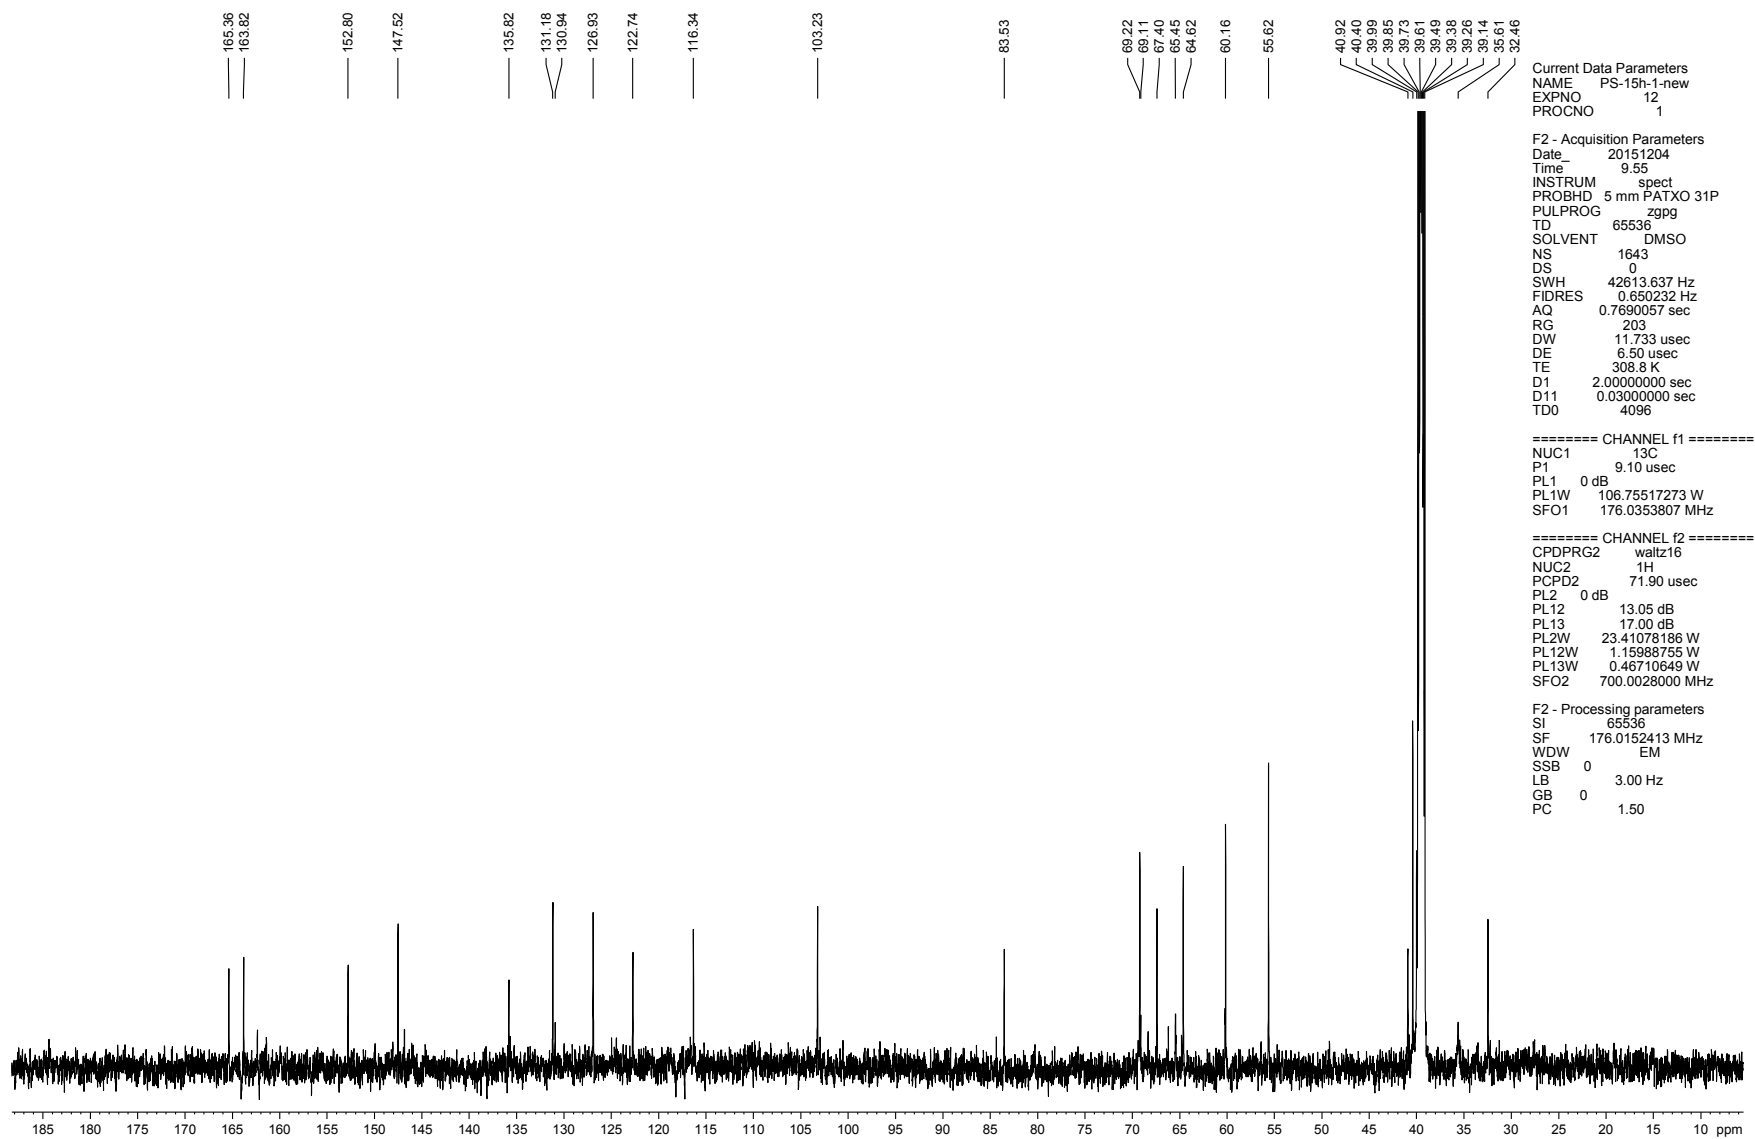

Figure S15.  $^{13}\text{C}$  NMR (176 MHz,  $\text{DMSO-d}_6$ ) spectrum of pretrichodermamide F (3).

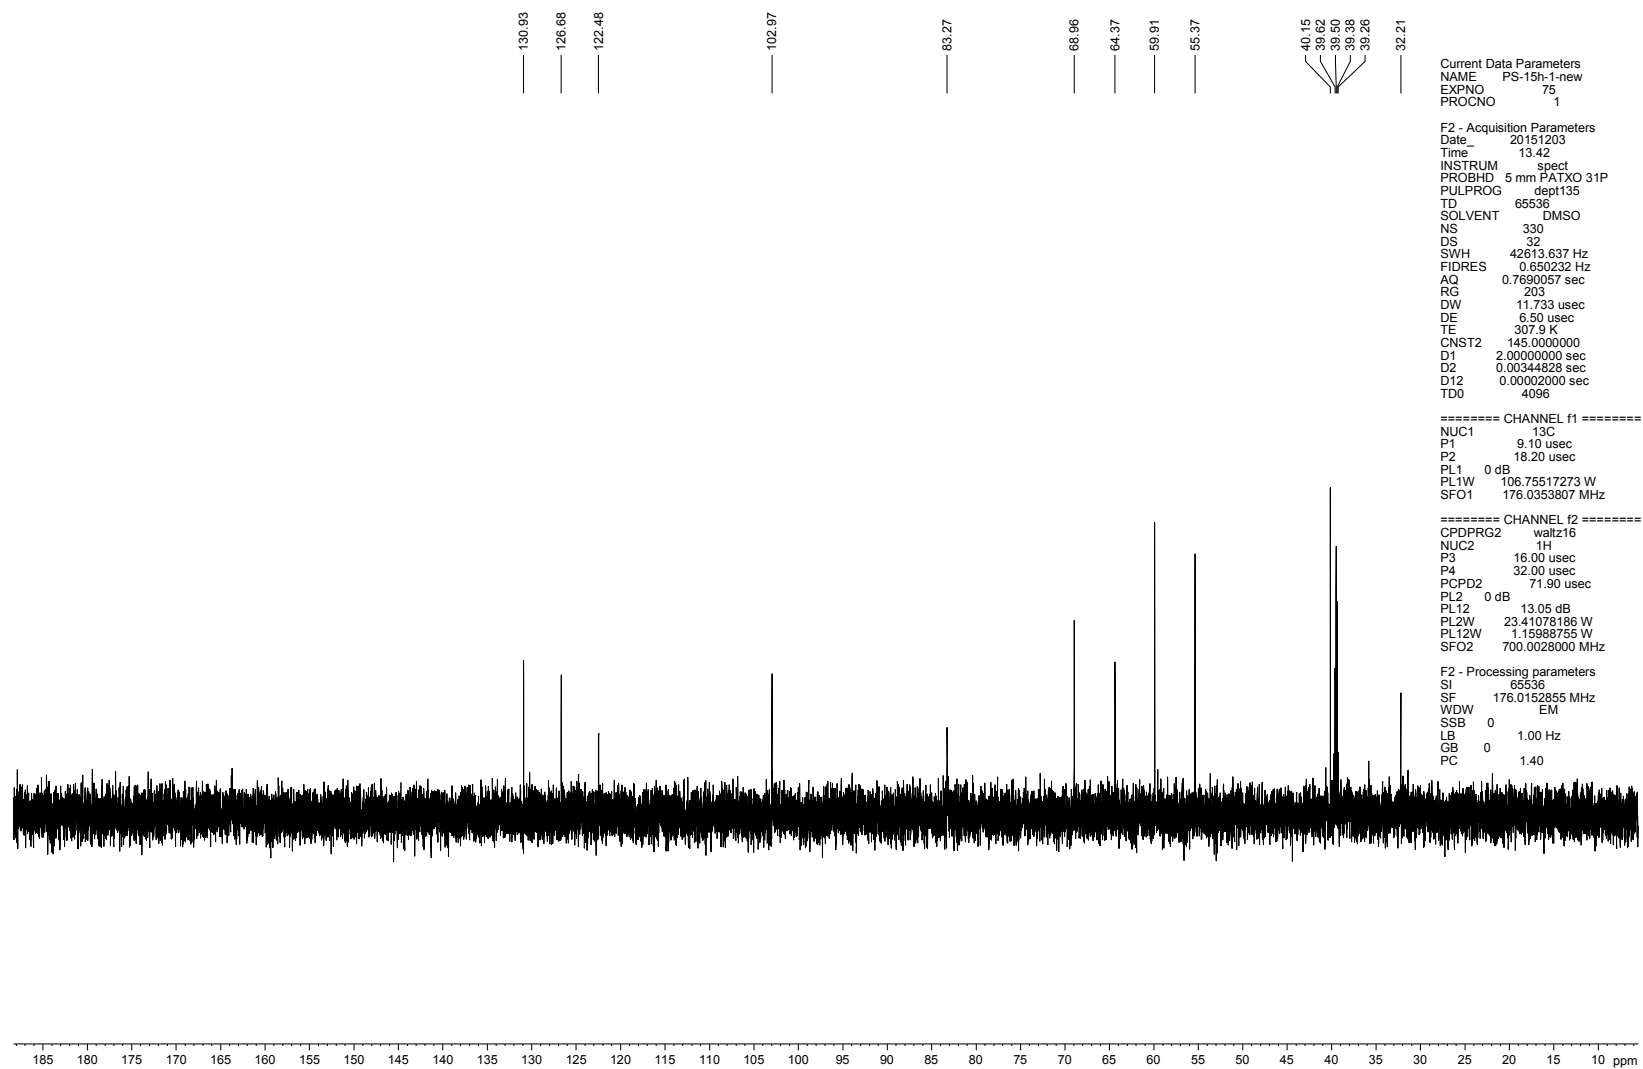

Figure S16. DEPT-135 (176 MHz, DMSO-d<sub>6</sub>) spectrum of pretrichodermamide F (3).

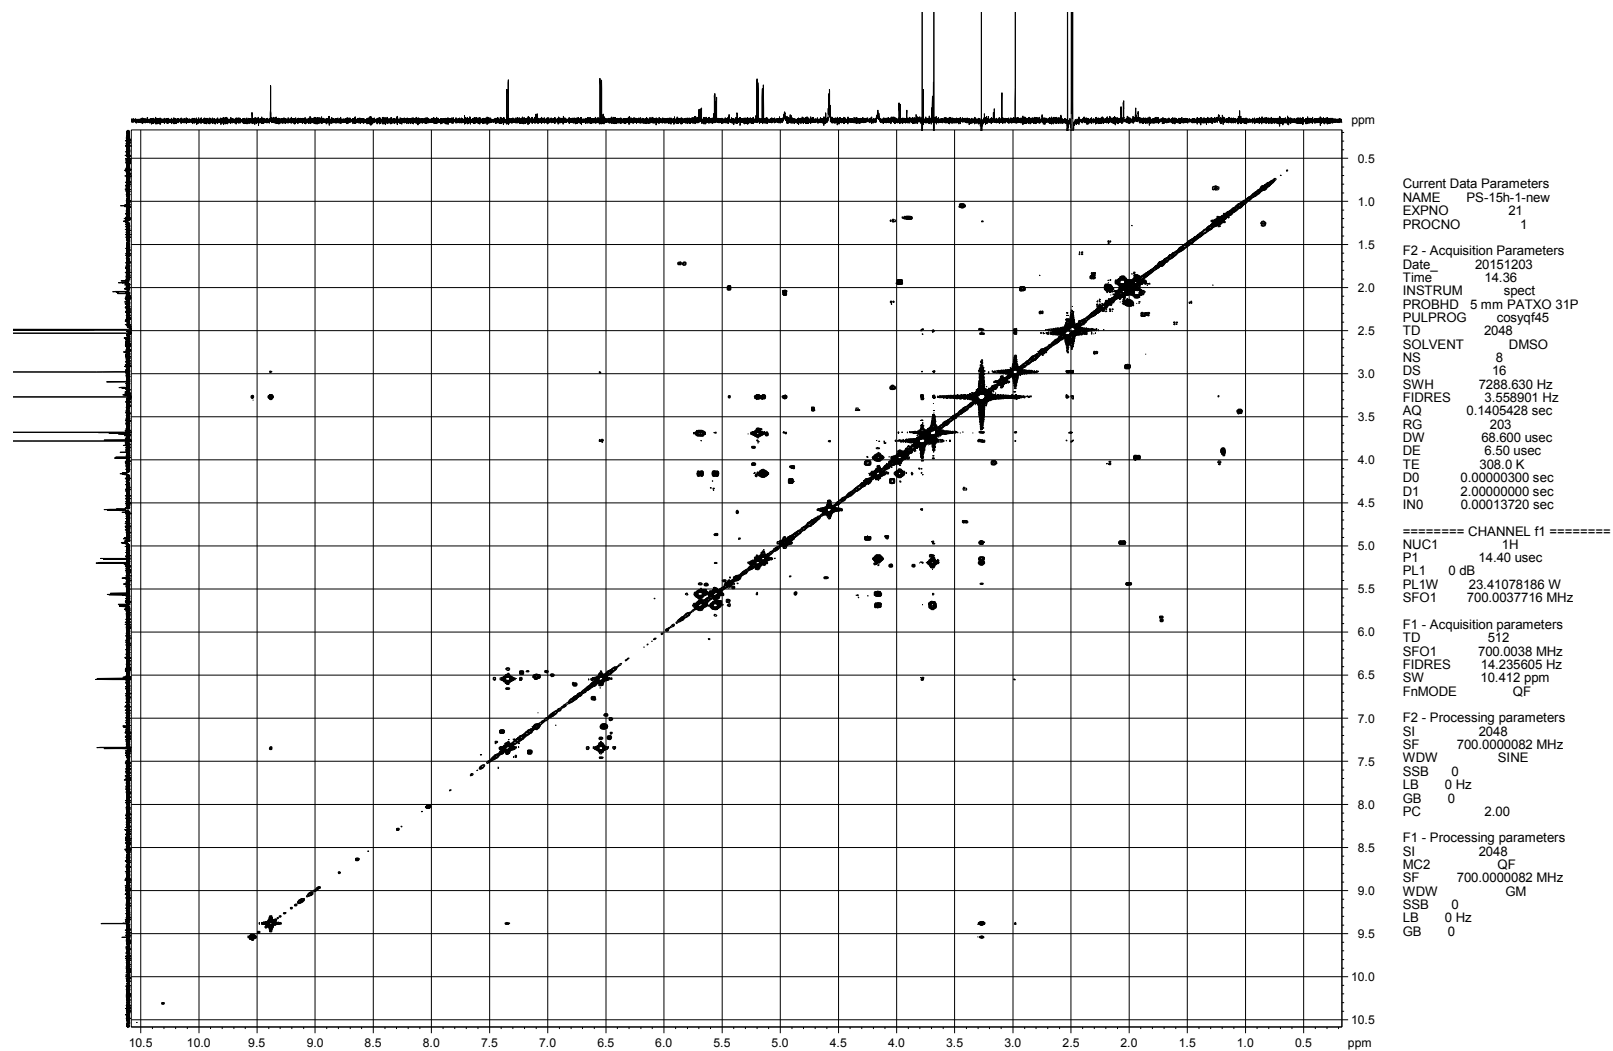

Figure S17.  $^1\text{H}$ - $^1\text{H}$  COSY (700 MHz, DMSO- $d_6$ ) spectrum of pretrichodermamide F (3).

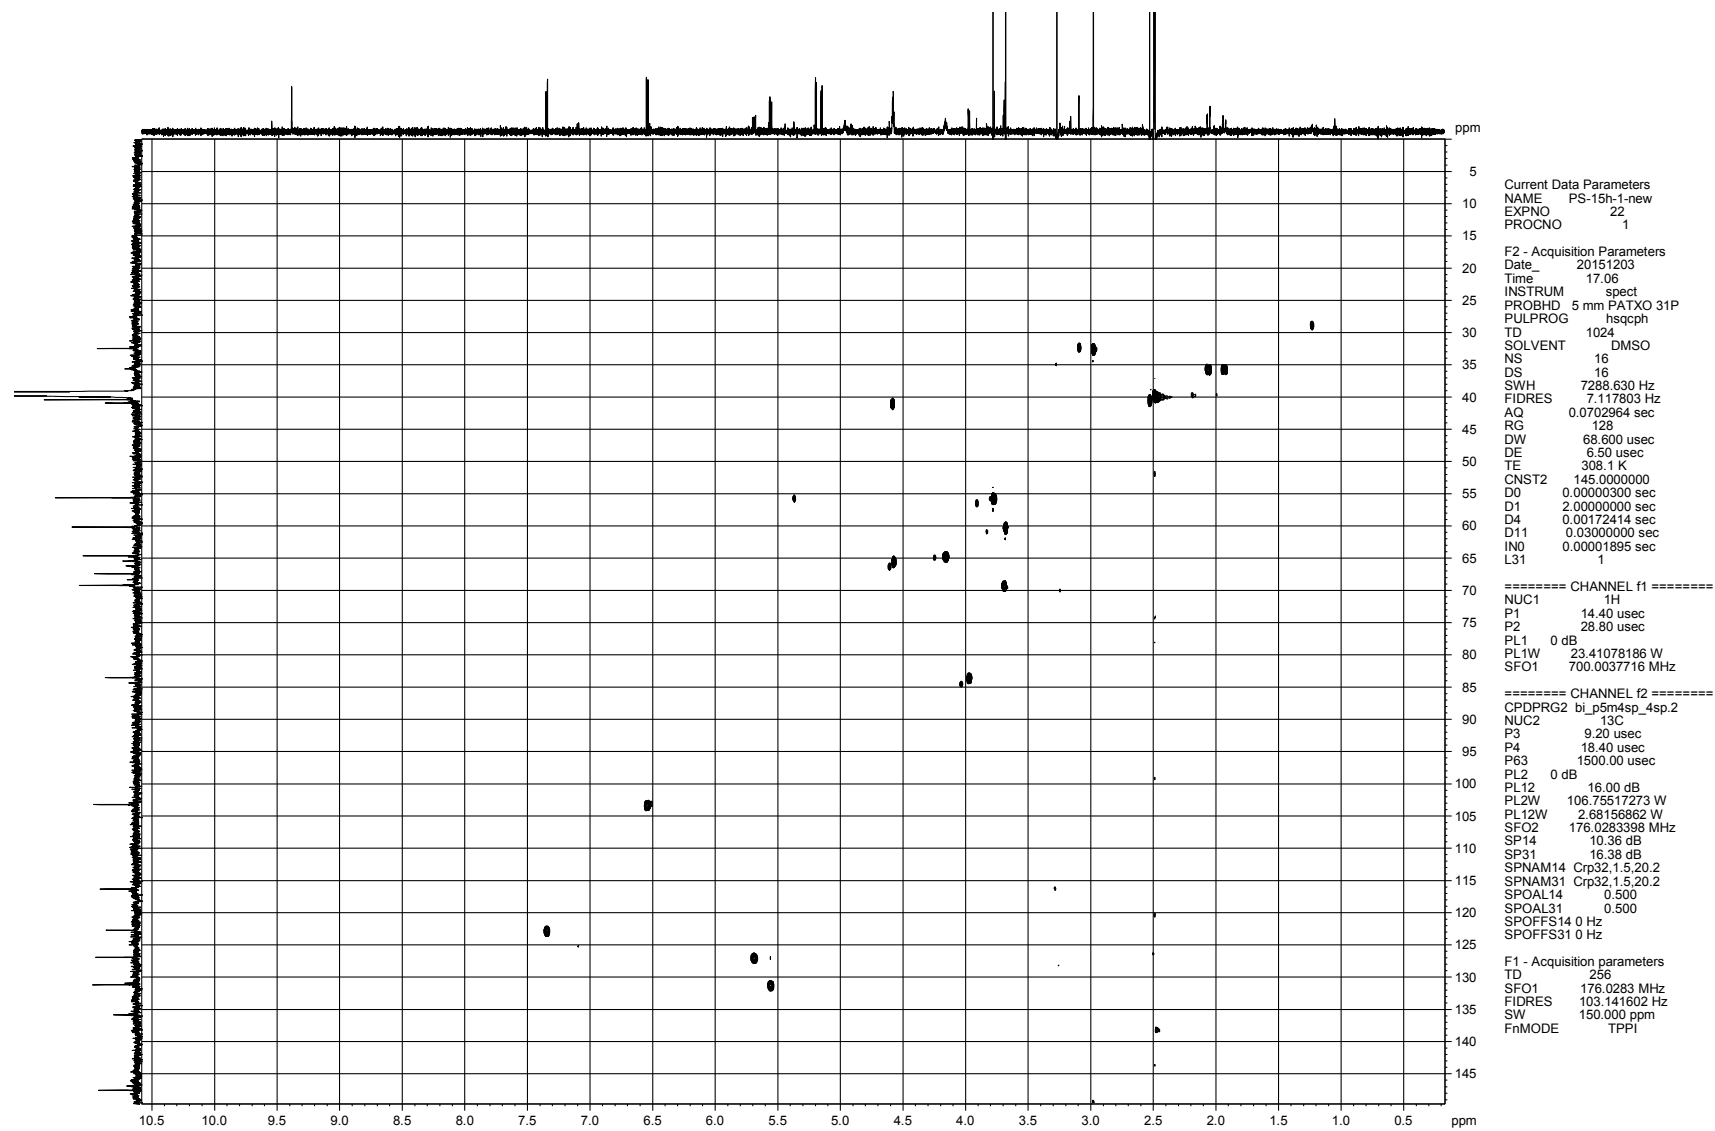Figure S18. HSQC (700 MHz, DMSO-d<sub>6</sub>) spectrum of pretrichodermamide F (3).

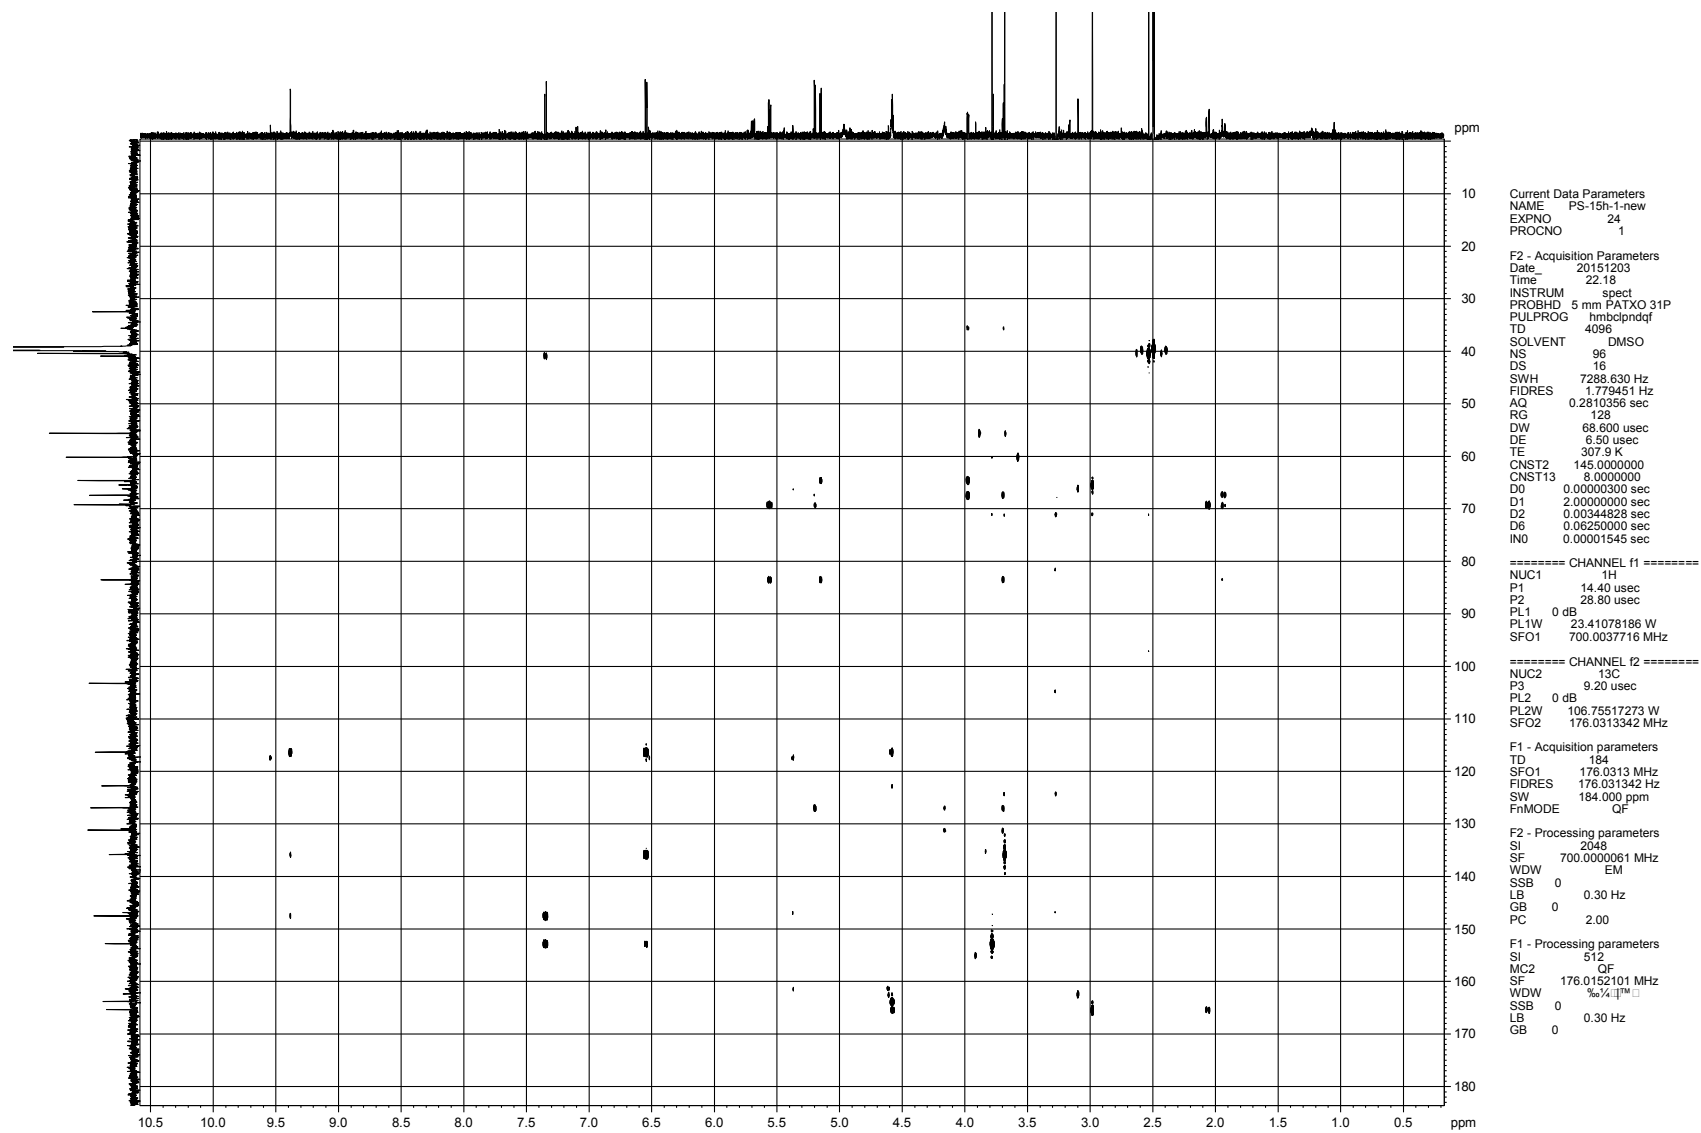Figure S19. HMBC (500 MHz, DMSO-d<sub>6</sub>) spectrum of pretrichodermamide F (3).

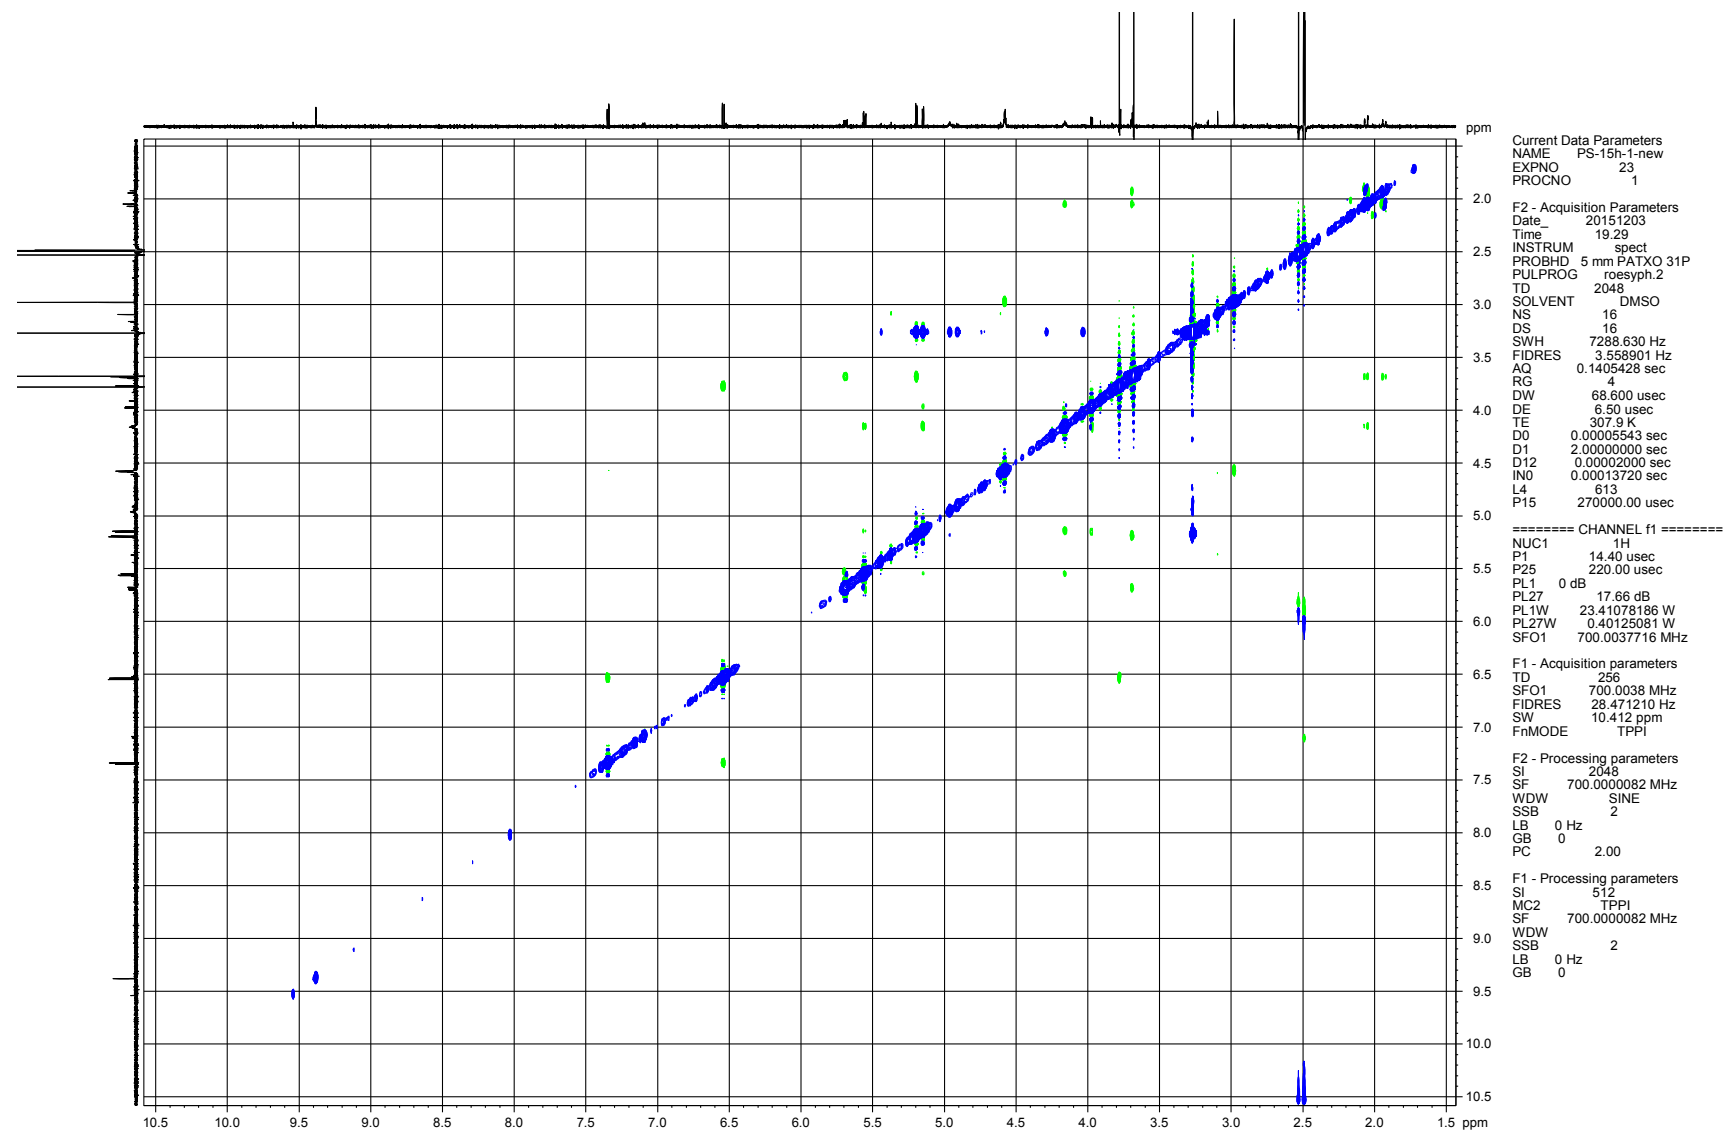

Figure S20. ROESY (700 MHz, DMSO-d<sub>6</sub>) spectrum of pretrichodermamide F (3).

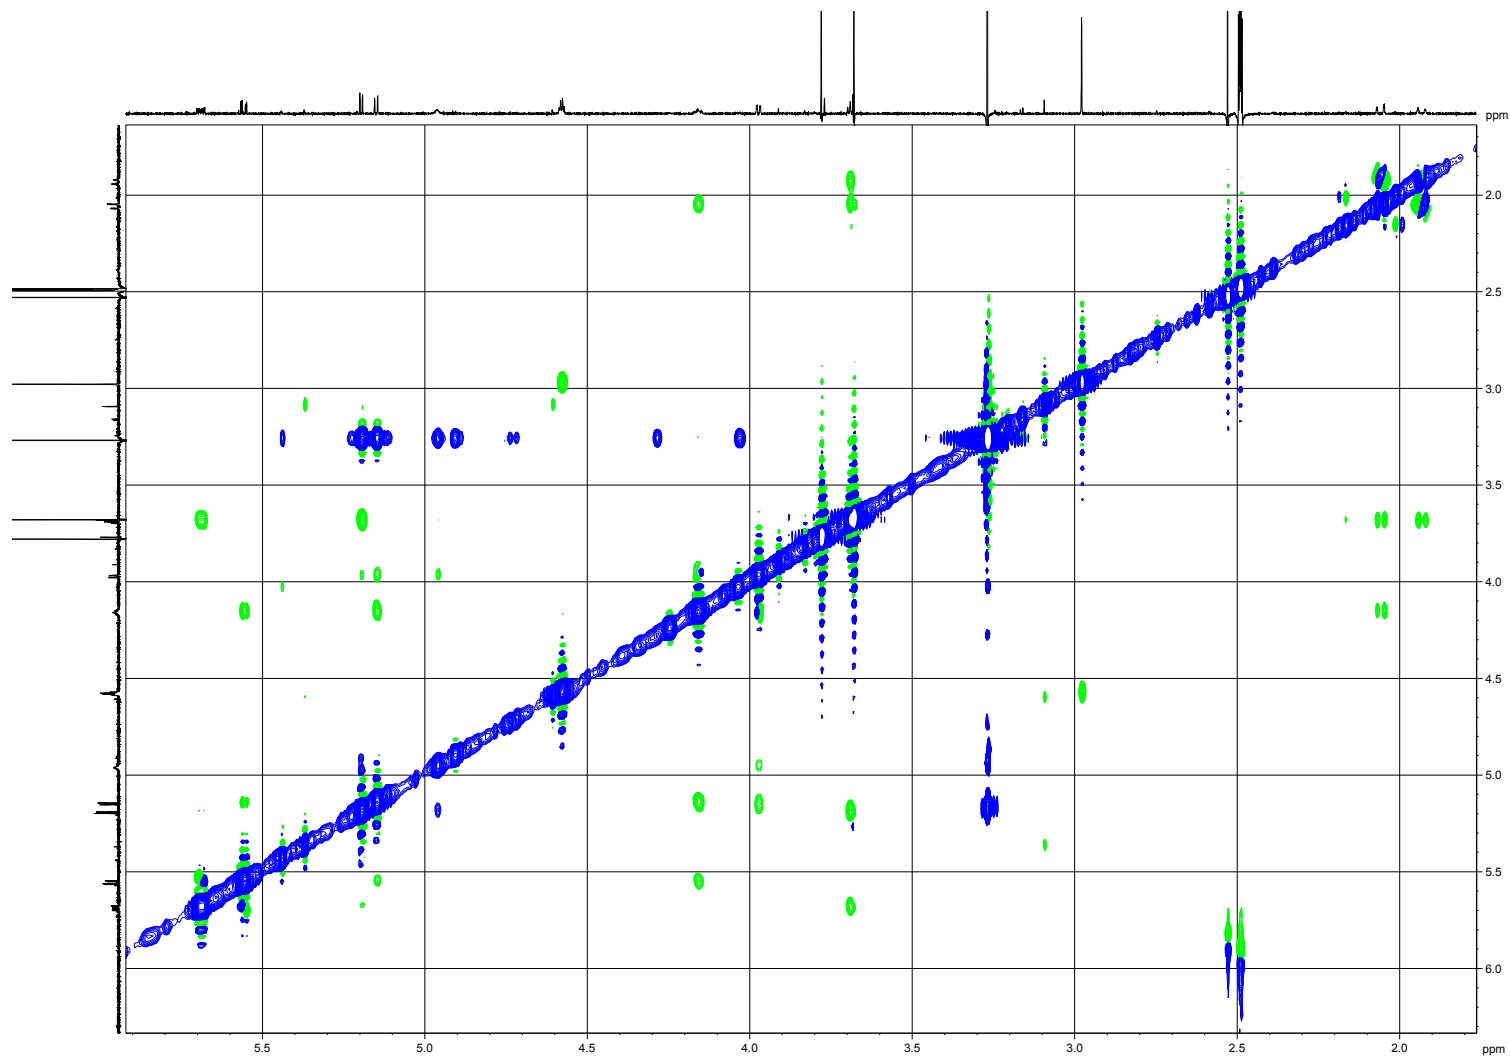

Figure S20 (continuation). ROESY (700 MHz, DMSO-d<sub>6</sub>) spectrum of pretrichodermamide F (3).



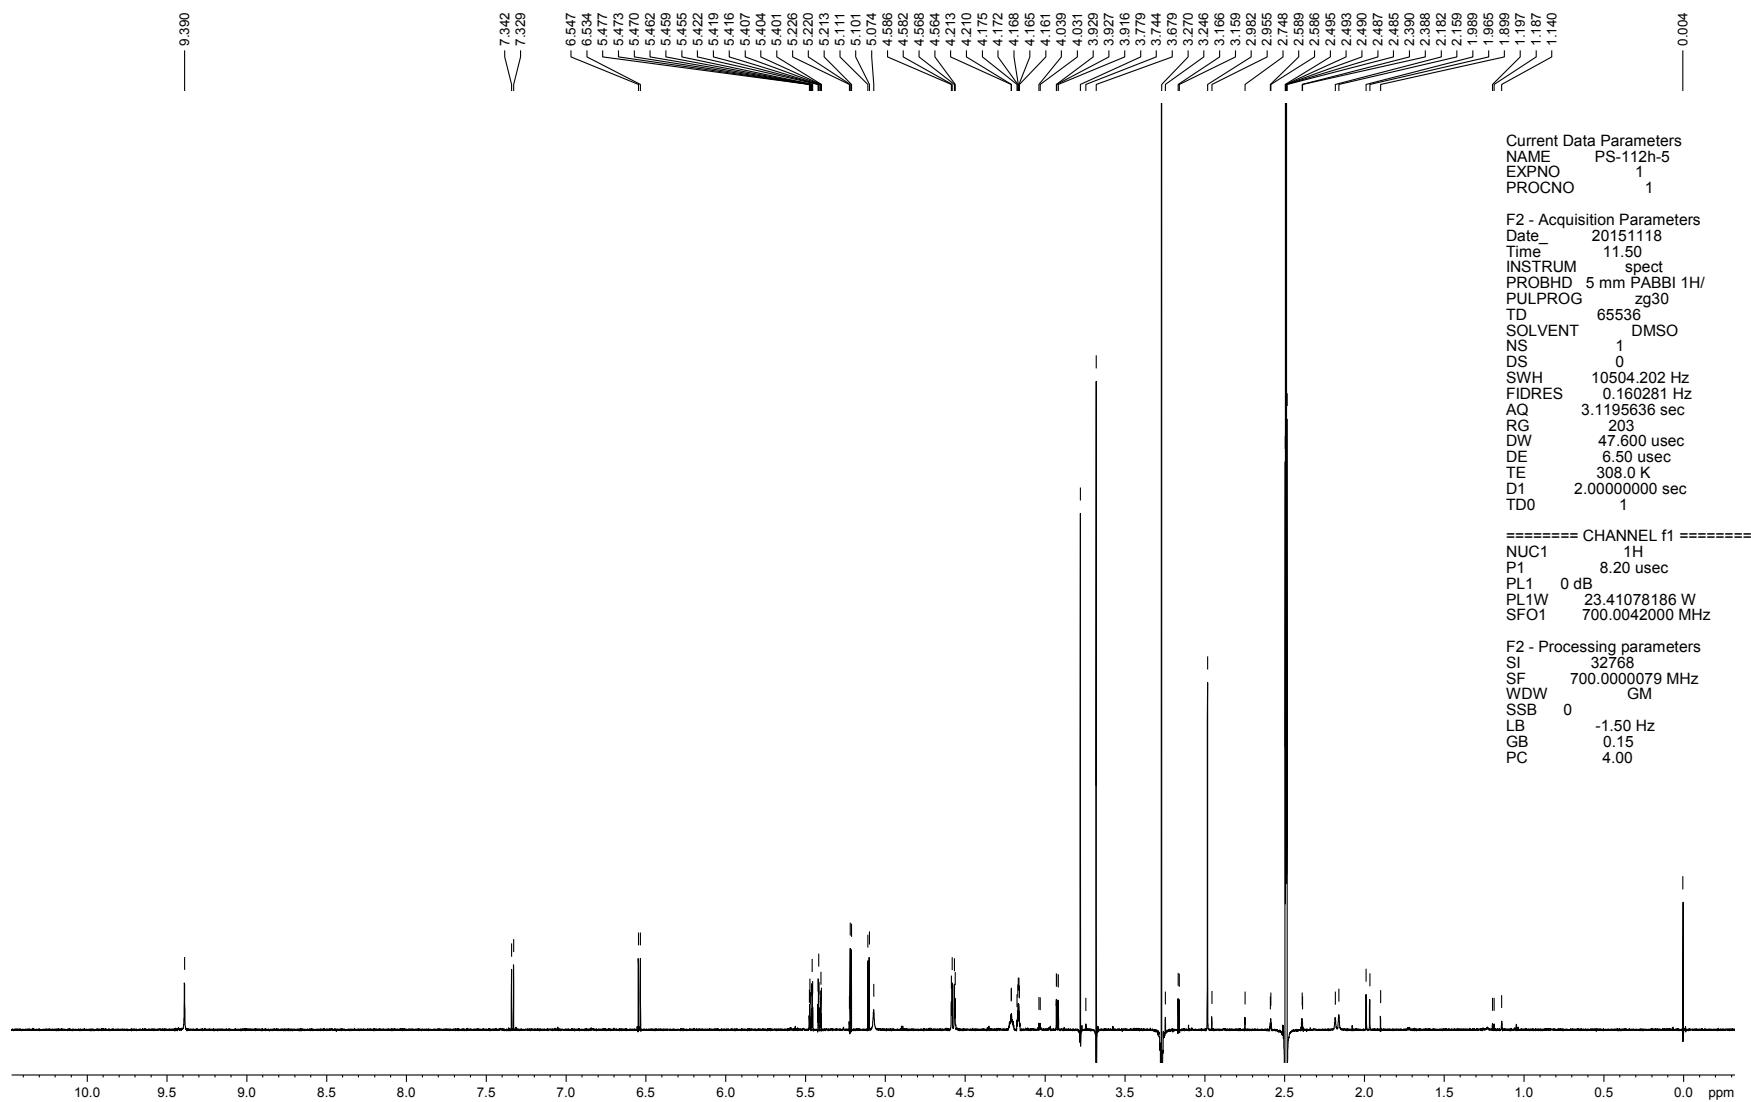

Figure S21.  $^1\text{H}$  NMR (700 MHz,  $\text{DMSO-d}_6$ ) spectrum of pretrichodermamide C (4).

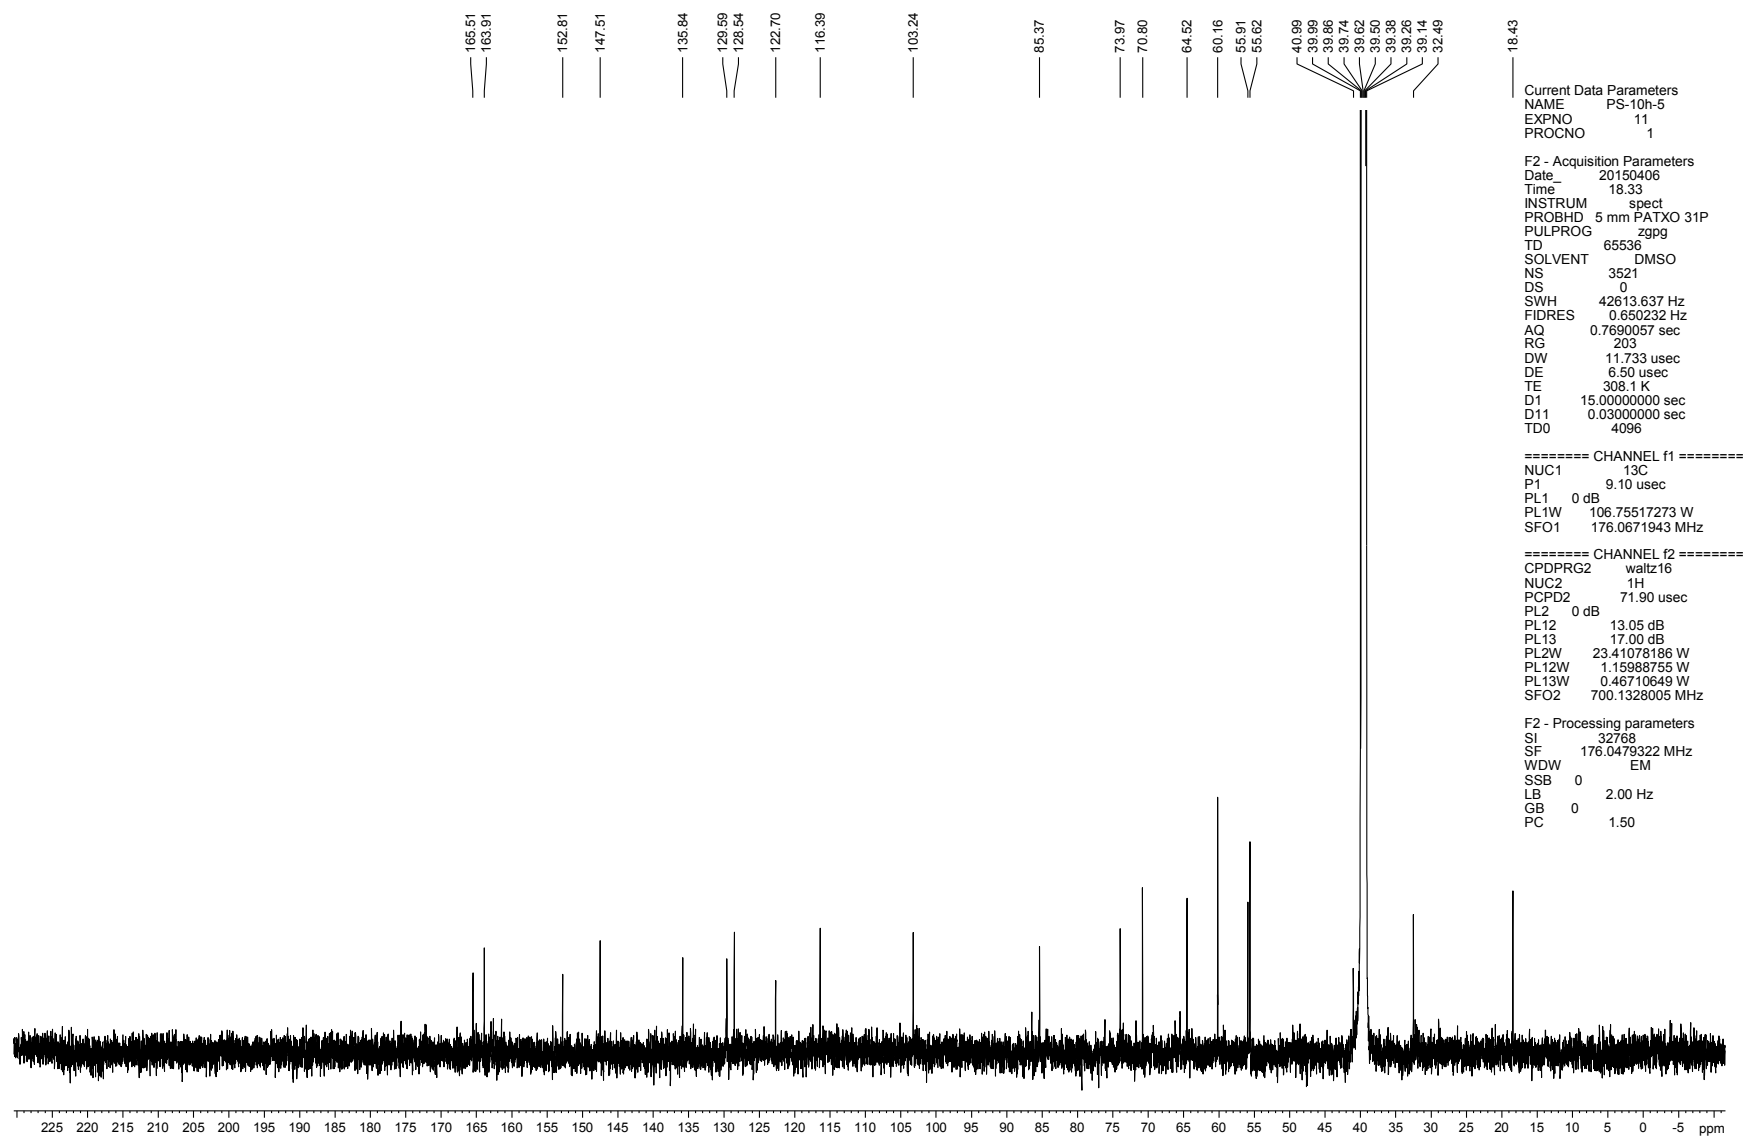

Figure S22.  $^{13}\text{C}$  NMR (176 MHz,  $\text{DMSO-d}_6$ ) spectrum of pretrichodermamide C (4).



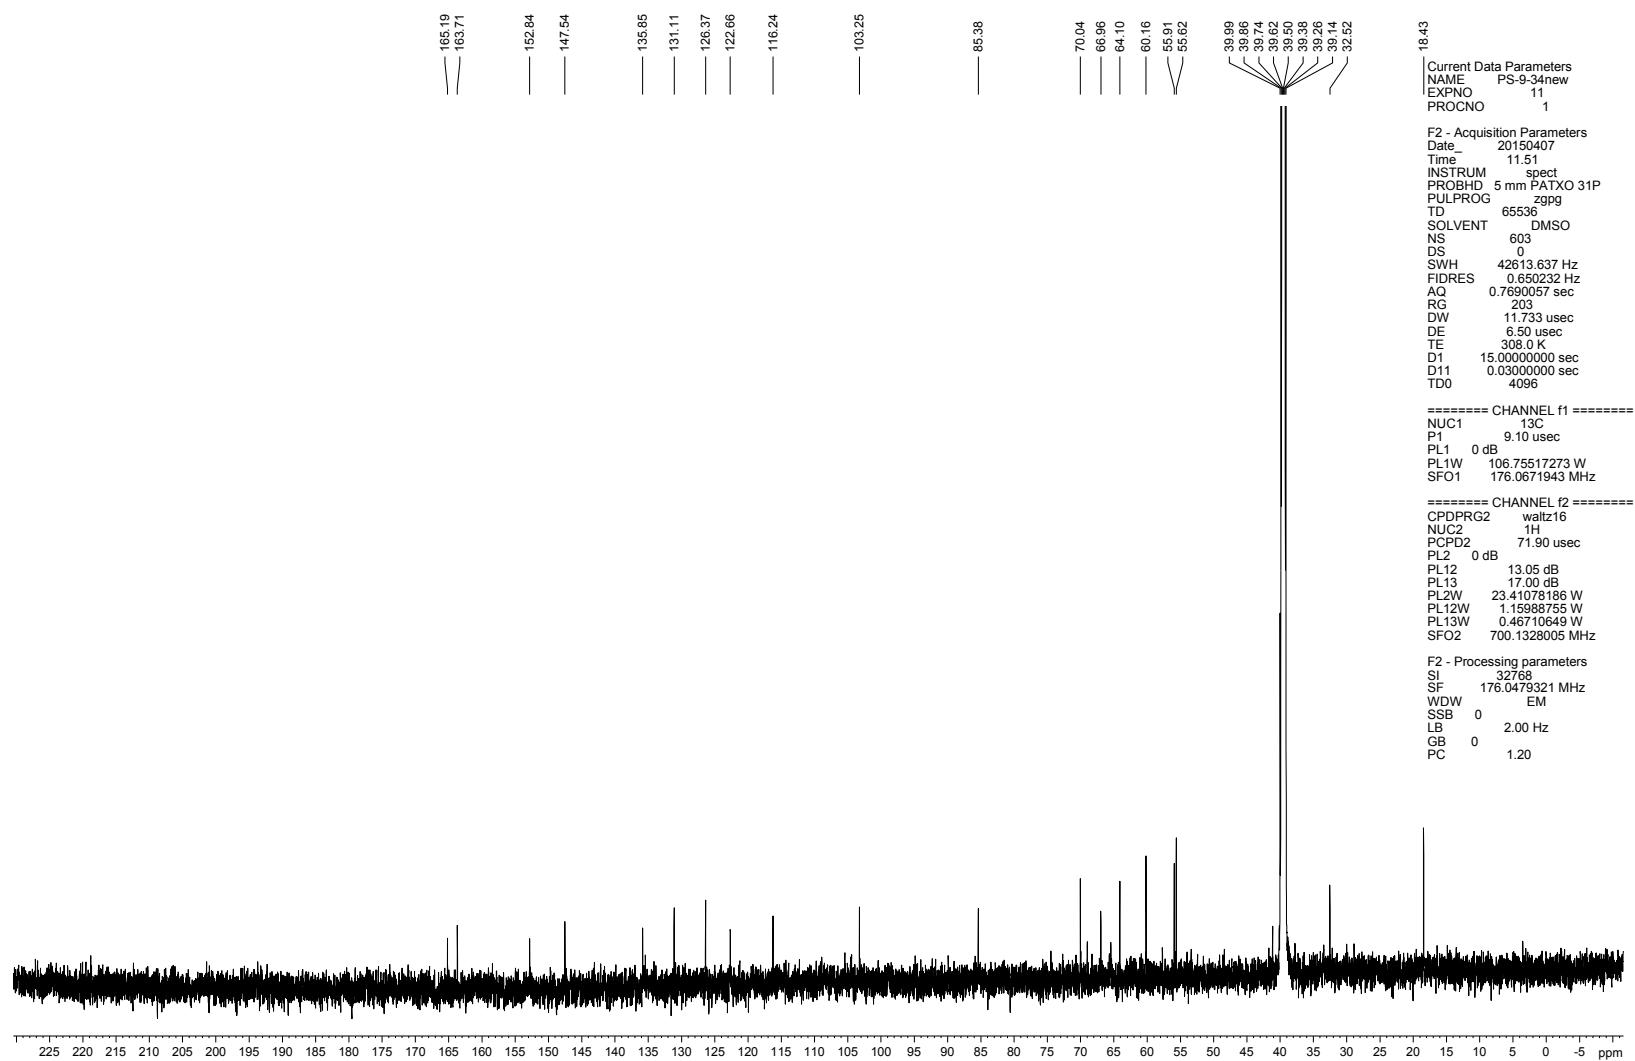

Figure S24.  $^{13}\text{C}$  NMR (176 MHz, DMSO- $d_6$ ) spectrum of *N*-methylpretrichodermamide B (5).

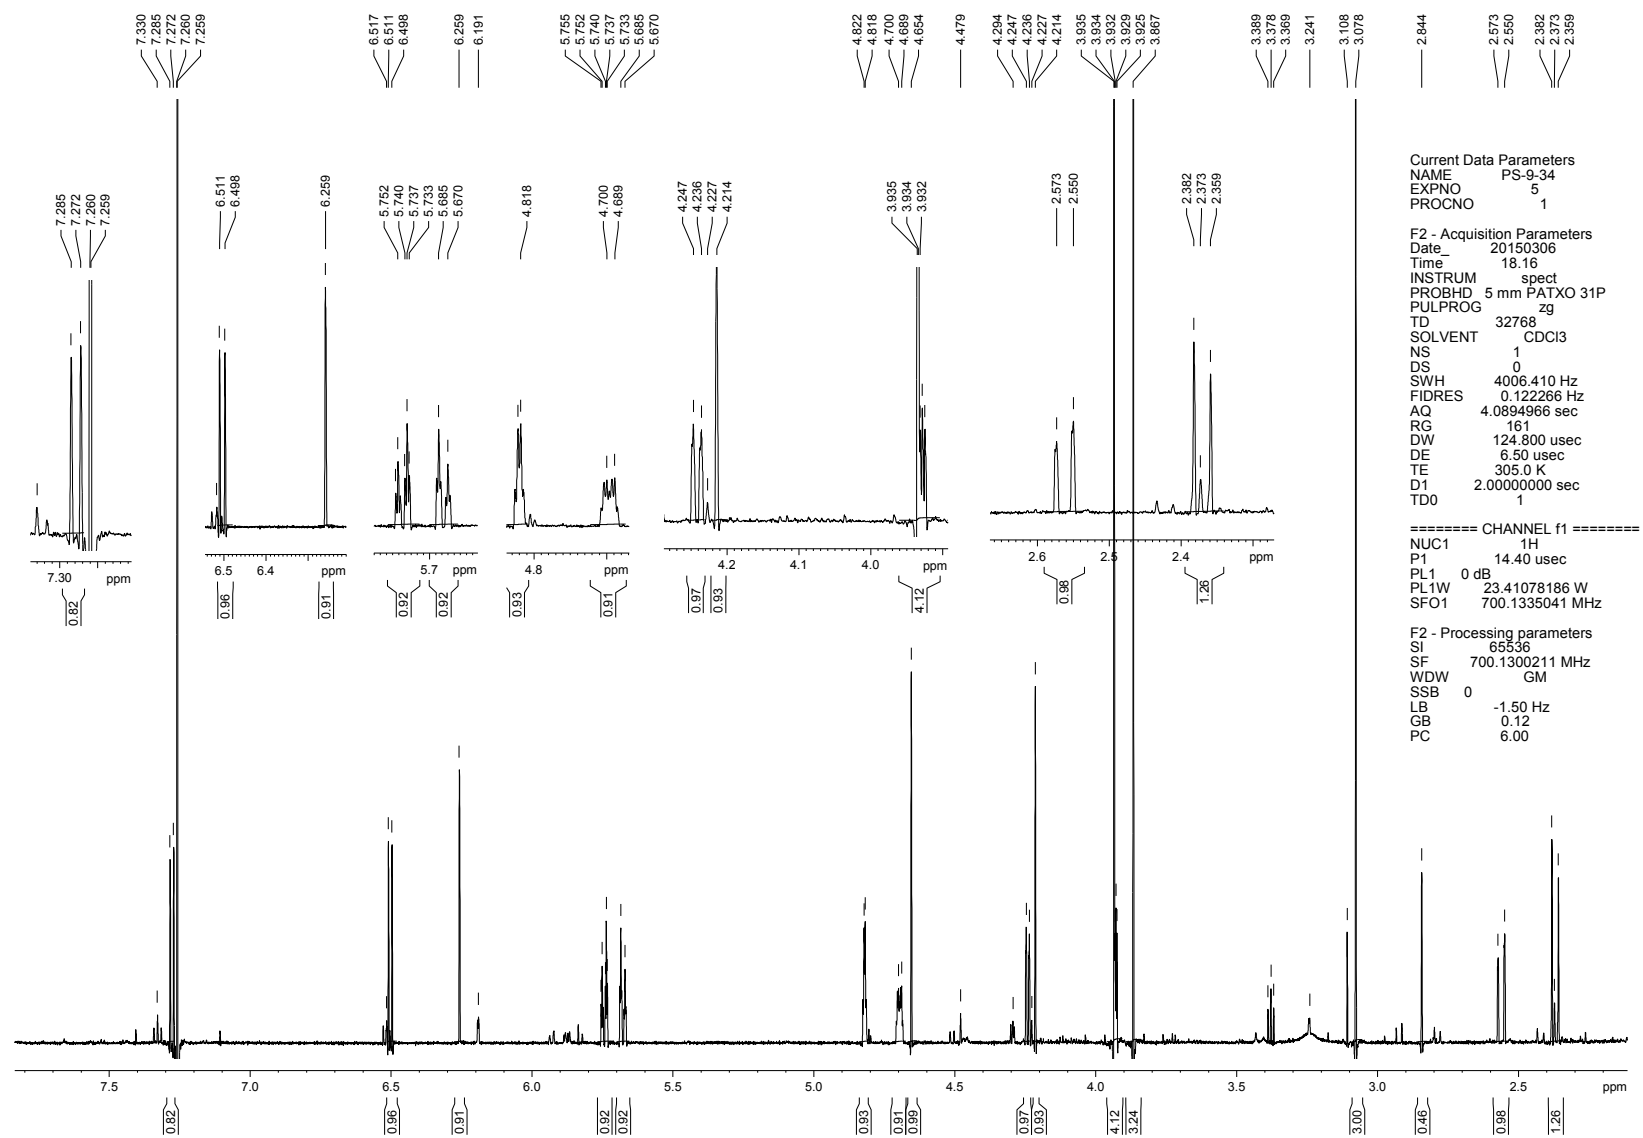Figure S25. <sup>1</sup>H NMR (700 MHz, CDCl<sub>3</sub>) spectrum of *N*-methylpretrichodermamide B (5).

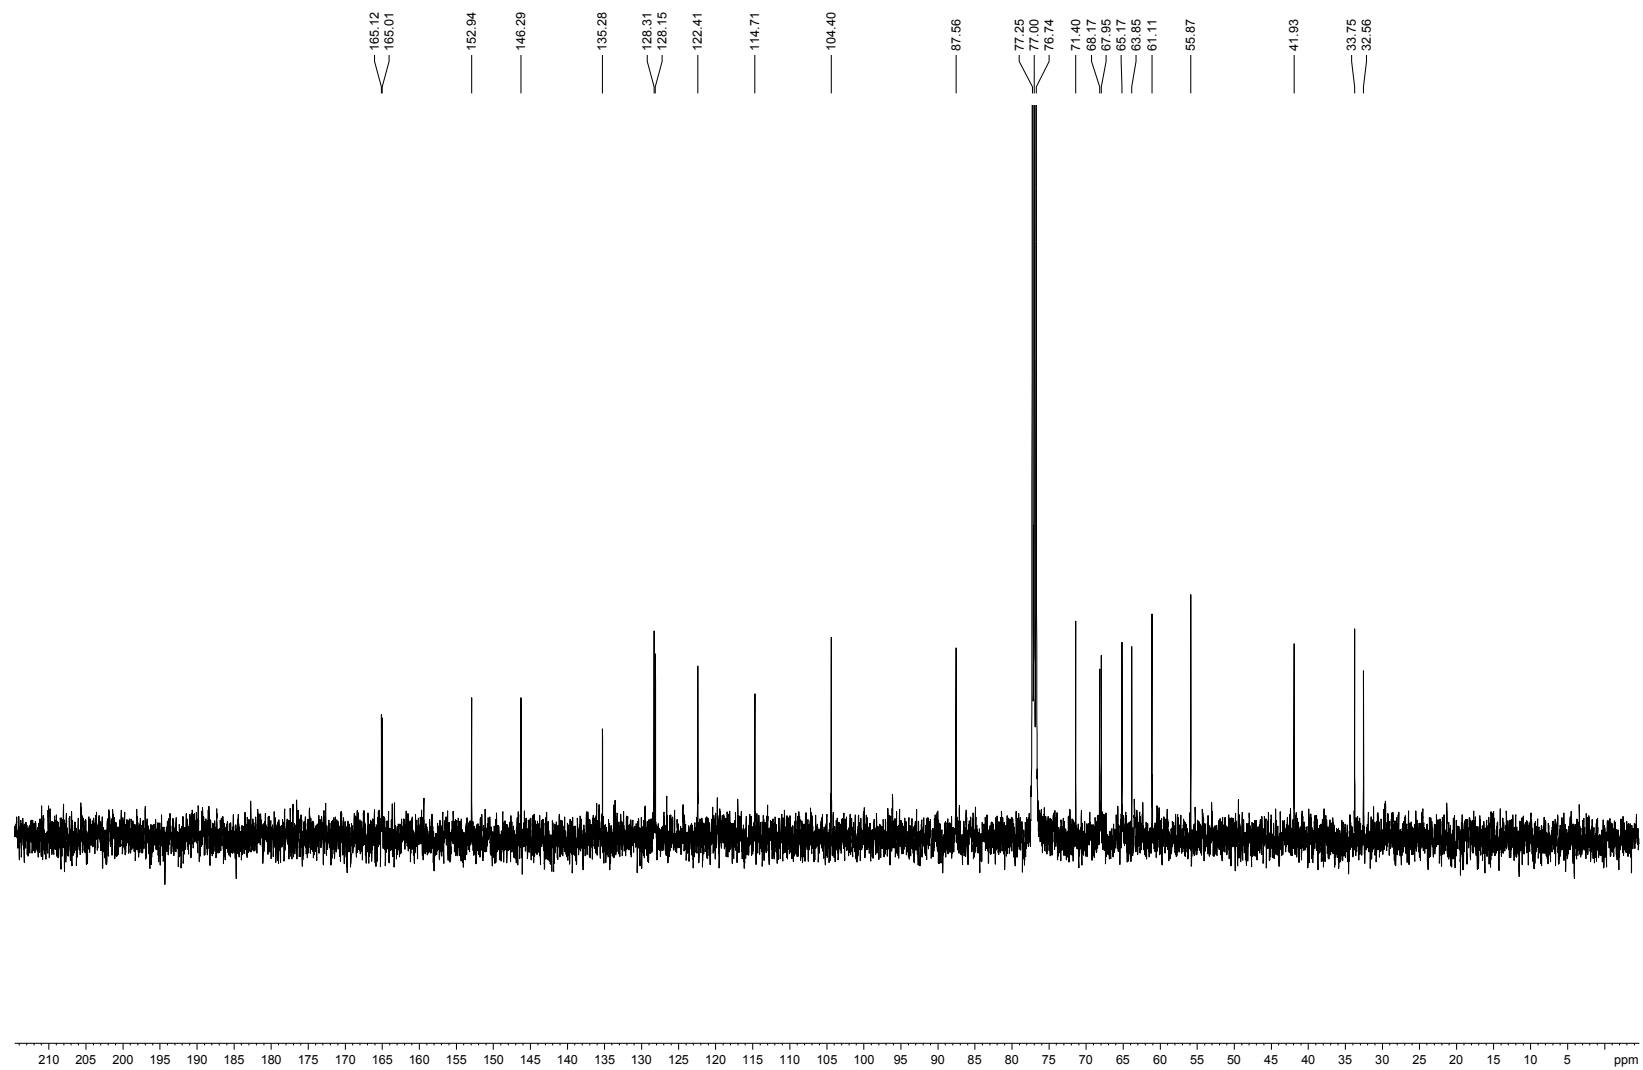

Figure S26. <sup>13</sup>C NMR (125 MHz, CDCl<sub>3</sub>) spectrum of *N*-methylpretrichodermamide B (5).
